# Supplementary material for: A simple ternary ion-pair complexation protocol for testing the enantiopurity and the absolute configurational analysis of acid and ester derivatives
Source: Royal Society of Chemistry journal article supplement (doi:10.1039/c8nj01489b), 2018-01-01
Supplement: c8nj01489b1.pdf [file c8nj01489b1.pdf]

## Supporting Information

# A Simple Ternary Ion-Pair Complexation Protocol for Testing the Enantiopurity and the Absolute Configurational Analysis of Acids and Ester Derivatives

Neeru Arya, Sandeep Kumar Mishra and N Suryaprakash\*

NMR Research Centre and Solid State and Structural Chemistry Unit, Indian Institute of Science, Bangalore 560012, India.

E-mail: [nsp@iisc.ac.in](mailto:nsp@iisc.ac.in); [suryaprakash1703@gmail.com](mailto:suryaprakash1703@gmail.com); Fax: +91 8023601550; Tel: +91 8023607344; +91 80 22933300; +919845124802 (Cell)

## Table of Contents

Fig. S1: 400 MHz <sup>1</sup>H-NMR spectrum of (*R*)-BINAM, (*R*)-Mandelic acid and TFMS in CDCl<sub>3</sub>

Fig. S2: 400 MHz <sup>1</sup>H-NMR spectrum of (*S*)-BINAM, (*R*)-Mandelic acid and TFMS in CDCl<sub>3</sub>

Fig. S3: 400 MHz <sup>1</sup>H-NMR spectrum of (*R*)-BINAM, (*S*)-Mandelic acid and TFMS in CDCl<sub>3</sub>

Fig. S4: 400 MHz <sup>1</sup>H-NMR spectrum of (*S*)-BINAM, (*S*)-Mandelic acid and TFMS in CDCl<sub>3</sub>

Fig. S5: 400 MHz <sup>1</sup>H-NMR spectrum of (*R*)-BINAM, (*R*)-(-)-2-chloromandelic acid and TFMS in CDCl<sub>3</sub>

Fig. S6: 400 MHz <sup>1</sup>H-NMR spectrum of (*S*)-BINAM, (*R*)-(-)-2-chloromandelic acid and TFMS in CDCl<sub>3</sub>

Fig. S7: 400 MHz <sup>1</sup>H-NMR spectrum of (*R*)-BINAM, (*R*)-(-)-hexahydroxymandelic acid and TFMS in CDCl<sub>3</sub>

Fig. S8: 400 MHz <sup>1</sup>H-NMR spectrum of (*S*)-BINAM, (*R*)-(-)-hexahydroxymandelic acid and TFMS in CDCl<sub>3</sub>

Fig. S9: 400 MHz <sup>1</sup>H-NMR spectrum of (*R*)-BINAM, (*L*)-(+)-lactic acid and TFMS in CDCl<sub>3</sub>

Fig. S10: 400 MHz <sup>1</sup>H-NMR spectrum of (*S*)-BINAM, (*L*)-(+)-lactic acid and TFMS in CDCl<sub>3</sub>

Fig. S11: 400 MHz <sup>1</sup>H-NMR spectrum of (*R*)-BINAM, (*S*)-(+)-2-hydroxy-3-methylbutyric acid and TFMS in CDCl<sub>3</sub>

Fig. S12: 400 MHz  $^1\text{H-NMR}$  spectrum of (*S*)-BINAM, (*S*)-(+)-2-hydroxy-3-methylbutyric acid and TFMS in  $\text{CDCl}_3$

Fig. S13: 400 MHz  $^1\text{H-NMR}$  spectrum of (*R*)-BINAM, (*S*)-(+)- $\alpha$ -hydroxy-1,3-dioxo-2-isoisoindolinebutyric acid and TFMS in  $\text{CDCl}_3$

Fig. S14: 400 MHz  $^1\text{H-NMR}$  spectrum of (*S*)-BINAM, (*S*)-(+)- $\alpha$ -hydroxy-1,3-dioxo-2-isoisoindolinebutyric acid and TFMS in  $\text{CDCl}_3$

Fig. S15: 400 MHz  $^1\text{H-NMR}$  spectrum of (*R*)-BINAM, (*S*)-(-)-3-hydroxy-3,3-dimethylbutanoic acid and TFMS in  $\text{CDCl}_3$

Fig. S16: 400 MHz  $^1\text{H-NMR}$  spectrum of (*S*)-BINAM, (*S*)-(-)-3-hydroxy-3,3-dimethylbutanoic acid and TFMS in  $\text{CDCl}_3$

Fig. S17: 400 MHz  $^1\text{H-NMR}$  spectrum of (*R*)-BINAM, (*L*)-(-)-3-phenyllactic acid and TFMS in  $\text{CDCl}_3$

Fig. S18: 400 MHz  $^1\text{H-NMR}$  spectrum of (*S*)-BINAM, (*L*)-(-)-3-phenyllactic acid and TFMS in  $\text{CDCl}_3$

Fig. S19: 400 MHz  $^1\text{H-NMR}$  spectrum of (*R*)-BINAM, (*S*)-(+)- $\alpha$ -methoxyphenylacetic acid and TFMS in  $\text{CDCl}_3$

Fig. S20: 400 MHz  $^1\text{H-NMR}$  spectrum of (*S*)-BINAM, (*S*)-(+)- $\alpha$ -methoxyphenylacetic acid and TFMS in  $\text{CDCl}_3$

Fig. S21: 400 MHz  $^1\text{H-NMR}$  spectrum of (*R*)-BINAM, (*R*)-(-)- $\alpha$ -methoxyphenylacetic acid and TFMS in  $\text{CDCl}_3$

Fig. S22: 400 MHz  $^1\text{H-NMR}$  spectrum of (*S*)-BINAM, (*R*)-(-)- $\alpha$ -methoxyphenylacetic acid and TFMS in  $\text{CDCl}_3$

Fig. S23: 400 MHz  $^1\text{H-NMR}$  spectrum of (*R*)-BINAM, Methyl (2*S*,3*R*)-(-)-2,3-dihydroxy-3-phenylpropionate and TFMS in  $\text{CDCl}_3$

Fig. S24: 400 MHz  $^1\text{H-NMR}$  spectrum of (*S*)-BINAM, Methyl (2*S*,3*R*)-(-)-2,3-dihydroxy-3-phenylpropionate and TFMS in  $\text{CDCl}_3$

Fig. S25: 400 MHz  $^1\text{H-NMR}$  spectrum of (*R*)-BINAM, Methyl (2*R*,3*S*)-(+)-2,3-dihydroxy-3-phenylpropionate and TFMS in  $\text{CDCl}_3$

Fig. S26: 400 MHz  $^1\text{H-NMR}$  spectrum of (*S*)-BINAM, Methyl (2*R*,3*S*)-(+)-2,3-dihydroxy-3-phenylpropionate and TFMS in  $\text{CDCl}_3$

Fig. S27: 400 MHz  $^1\text{H-NMR}$  spectrum of (*R*)-BINAM, (*R*)-pyrrolidine-2-carboxylic acid methyl ester and TFMS in  $\text{CDCl}_3$

Fig. S28: 400 MHz  $^1\text{H-NMR}$  spectrum of (*S*)-BINAM, (*R*)-pyrrolidine-2-carboxylic acid methyl ester and TFMS in  $\text{CDCl}_3$

Fig. S29: 400 MHz  $^1\text{H-NMR}$  spectrum of (*R*)-BINAM, Benzyl (*R*)-(-)-mandelate and TFMS in  $\text{CDCl}_3$

Fig. S30: 400 MHz  $^1\text{H-NMR}$  spectrum of (*S*)-BINAM, Benzyl (*R*)-(-)-mandelate and TFMS in  $\text{CDCl}_3$

Fig. S31: 400 MHz  $^1\text{H-NMR}$  spectrum of (*R*)-BINAM, Benzyl (*S*)-(+)-mandelate and TFMS in  $\text{CDCl}_3$

Fig. S32: 400 MHz  $^1\text{H-NMR}$  spectrum of (*S*)-BINAM, Benzyl (*S*)-(+)-mandelate and TFMS in  $\text{CDCl}_3$

Fig. S33: 400 MHz  $^1\text{H-NMR}$  spectrum of (*R*)-BINAM, (*R*)-(-)-4-phenyl-2-oxazolidinone and TFMS in  $\text{CDCl}_3$

Fig. S34: 400 MHz  $^1\text{H-NMR}$  spectrum of (*S*)-BINAM, (*R*)-(-)-4-phenyl-2-oxazolidinone and TFMS in  $\text{CDCl}_3$

Fig. S35: 400 MHz  $^1\text{H-NMR}$  spectrum of (*R*)-BINAM, (*S*)-(+)-4-phenyl-2-oxazolidinone and TFMS in  $\text{CDCl}_3$

Fig. S36: 400 MHz  $^1\text{H-NMR}$  spectrum of (*S*)-BINAM, (*S*)-(+)-4-phenyl-2-oxazolidinone and TFMS in  $\text{CDCl}_3$

Fig. S37: 400 MHz  $^1\text{H-NMR}$  spectrum of (*R*)-BINAM, Methyl (2*S*,3*R*)-(-)-2,3-dihydroxy-3-phenylpropionate and TFMS in  $\text{CDCl}_3$  at 250K

Fig. S38: 400 MHz  $^1\text{H-NMR}$  spectrum of (*R*)-BINAM, (*R*)-(-)-4-phenyl-2-oxazolidinone and TFMS in  $\text{CDCl}_3$  at 250K

Fig. S39: 400 MHz  $^1\text{H-NMR}$  spectrum of (*R*)-BINAM, Lactic acid (from deamination reaction of Alanine), and TFMS in  $\text{CDCl}_3$  at 298K (RT) with zoomed  $\alpha$ -proton region.

Fig. S40: 400 MHz  $^1\text{H-NMR}$  spectrum of (*R*)-BINAM, Lactic acid (from deamination reaction of Alanine), and TFMS in  $\text{CDCl}_3$  at 250K with zoomed  $\alpha$ -proton region.

Fig. S41: 400 MHz  $^1\text{H-NMR}$  spectrum of (*R*)-BINAM, 2-hydroxy-3-methylbutyric acid (from deamination reaction of Valine), and TFMS in  $\text{CDCl}_3$  at 298K (RT) with zoomed  $\alpha$ -proton region.

Fig. S42: 400 MHz  $^1\text{H-NMR}$  spectrum of (*R*)-BINAM, 2-hydroxy-3-methylbutyric acid (from deamination reaction of Valine), and TFMS in  $\text{CDCl}_3$  at 250K with zoomed  $\alpha$ -proton region.

Fig. S43: 800 MHz 2D-NOSEY spectrum of (*R*)-BINAM, (*R*)-Mandelic acid and TFMS in  $\text{CDCl}_3$

Fig. S44: 800 MHz 2D-NOSEY spectrum of (*S*)-BINAM, (*R*)-Mandelic acid and TFMS in  $\text{CDCl}_3$

Table S1: The experimentally measured and laboratory prepared scalemic ratios of (*R*)-BINAM and (*R/S*)-Mandelic acid in the presence of TFMS

Coordinates for (*R*)-BINAM/ (*R*)-Mandelic acid/ TFMS complex (Gaussian 09)

Coordinates for (*R*)-BINAM/ (*S*)-Mandelic acid/ TFMS complex (Gaussian 09)

Coordinates for (*S*)-BINAM/ (*R*)-Mandelic acid/ TFMS complex (Gaussian 09)

Coordinates for (*S*)-BINAM/ (*S*)-Mandelic acid/ TFMS complex (Gaussian 09)

## Reference

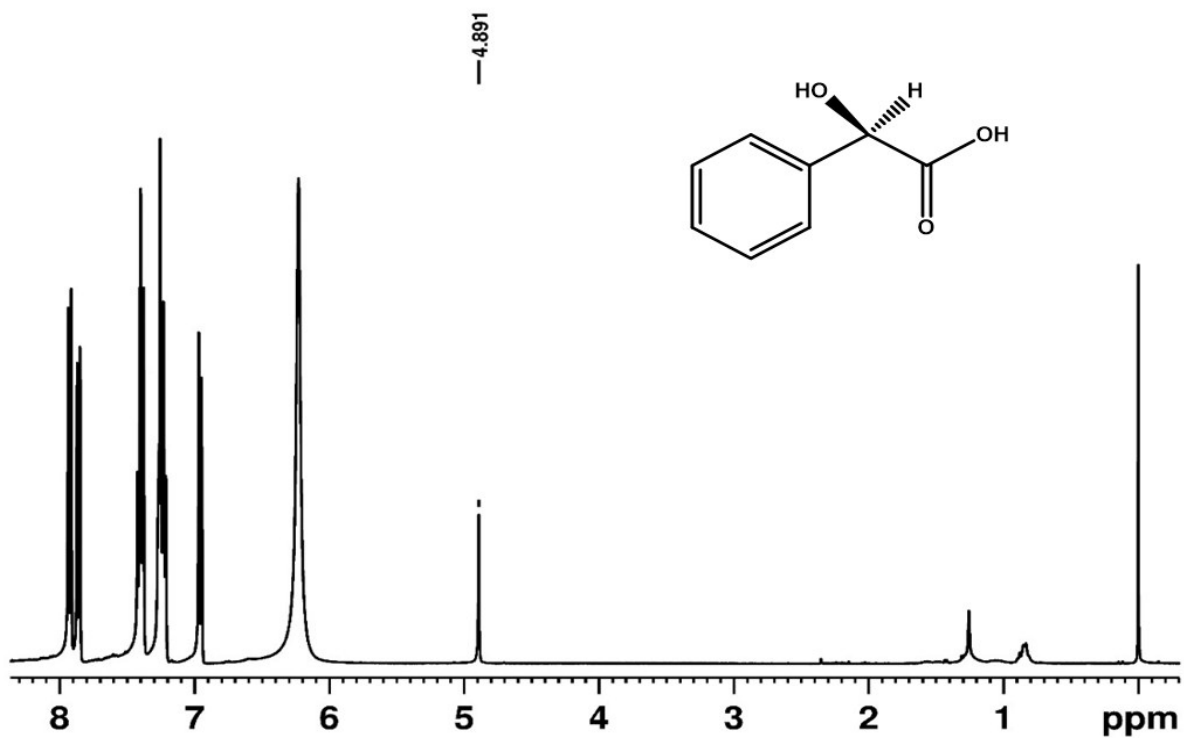

**Fig.S1:** 400 MHz  $^1\text{H}$ -NMR spectrum of (*R*)-BINAM, (*R*)-Mandelic acid and TFMS in  $\text{CDCl}_3$ .

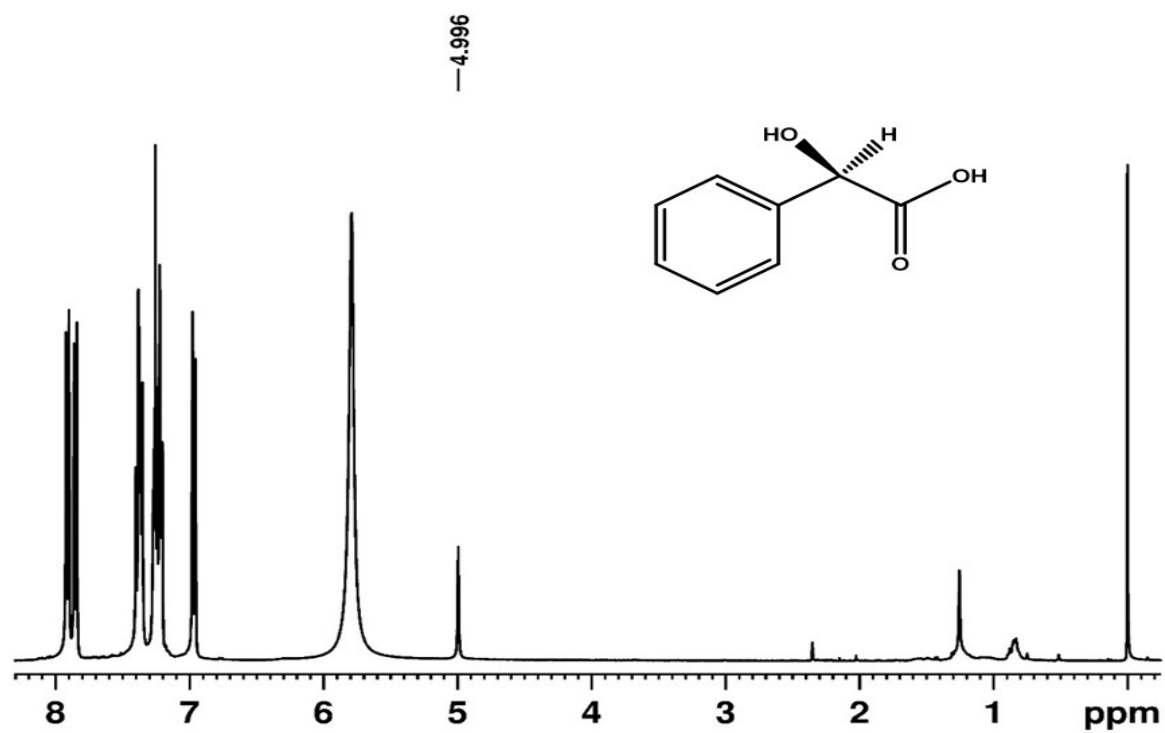

**Fig.S2:** 400 MHz  $^1\text{H}$ -NMR spectrum of (*S*)-BINAM, (*R*)-Mandelic acid and TFMS in  $\text{CDCl}_3$ .

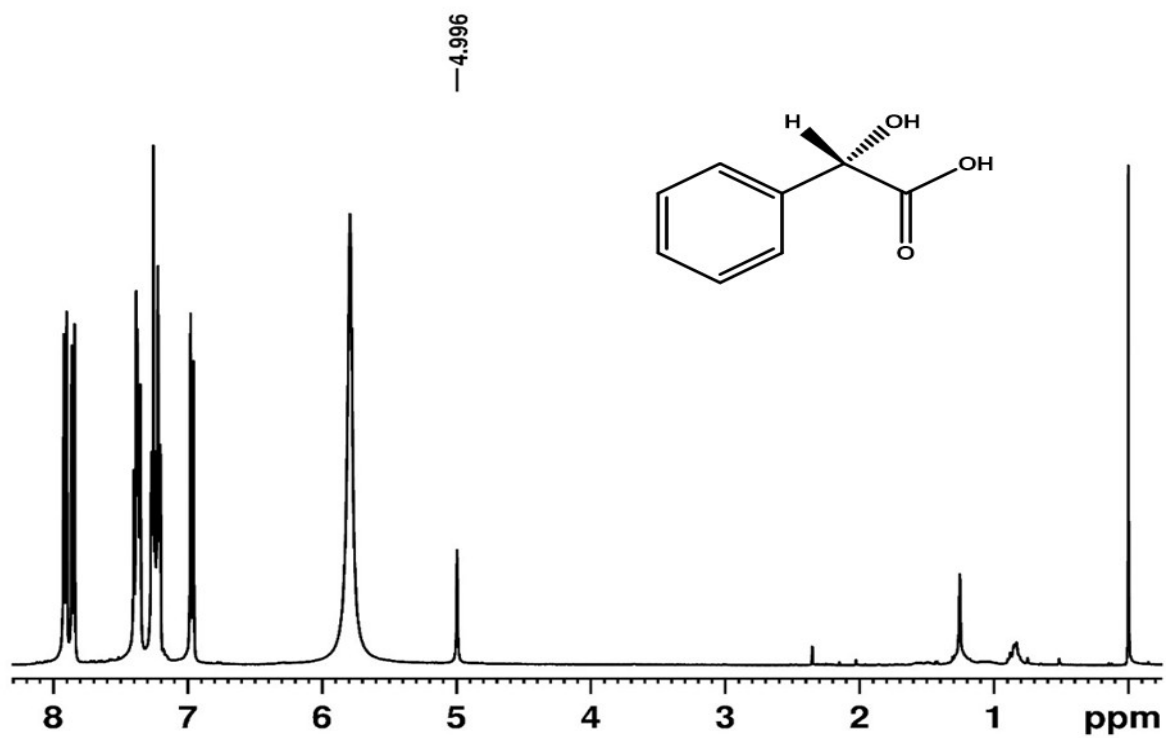

**Fig. S3:** 400 MHz <sup>1</sup>H-NMR spectrum of (*R*)-BINAM, (*S*)-Mandelic acid and TFMS in CDCl<sub>3</sub>.

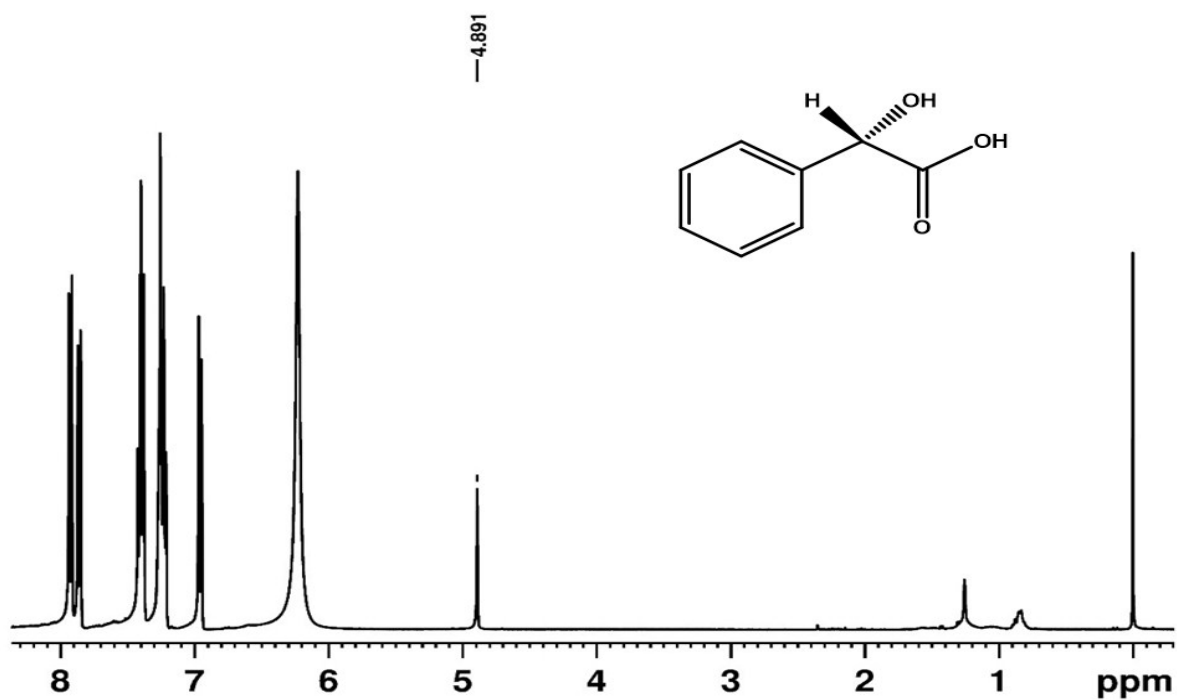

**Fig. S4:** 400 MHz <sup>1</sup>H-NMR spectrum of (*S*)-BINAM, (*S*)-Mandelic acid and TFMS in CDCl<sub>3</sub>.

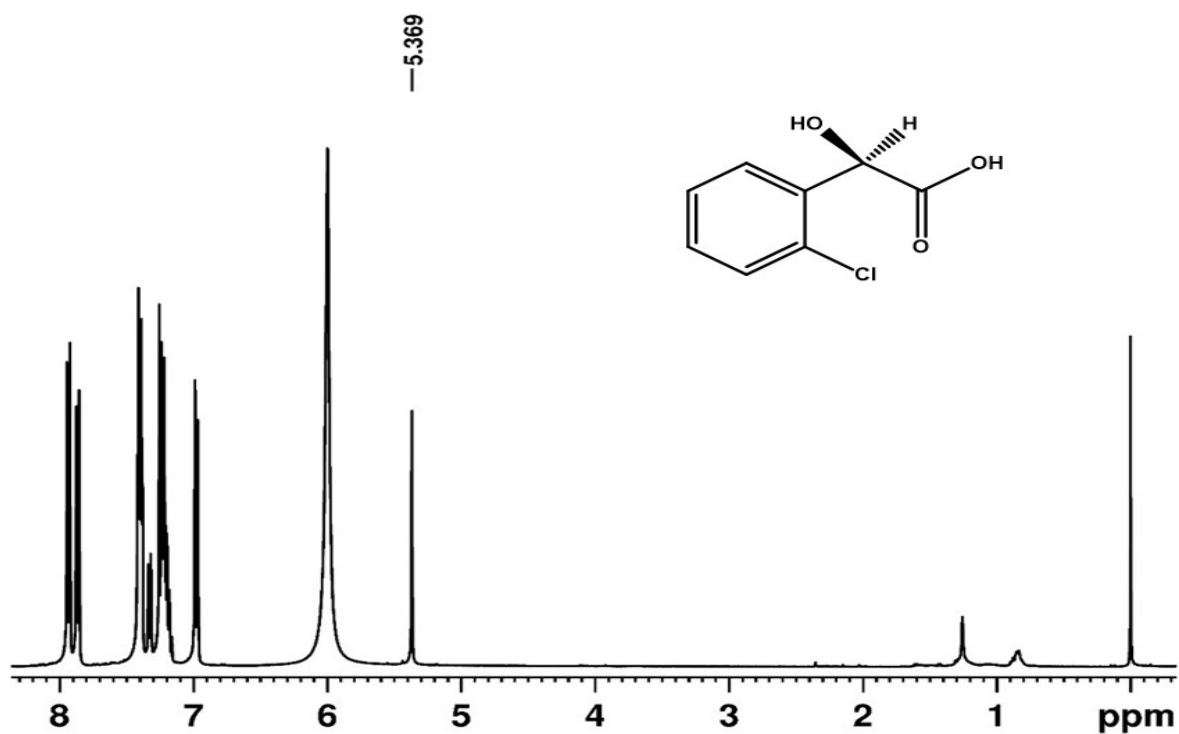

**Fig. S5:** 400 MHz  $^1\text{H-NMR}$  spectrum of *(R)*-BINAM, *(R)*-(-)-2-chloromandelic acid and TFMS in  $\text{CDCl}_3$ .

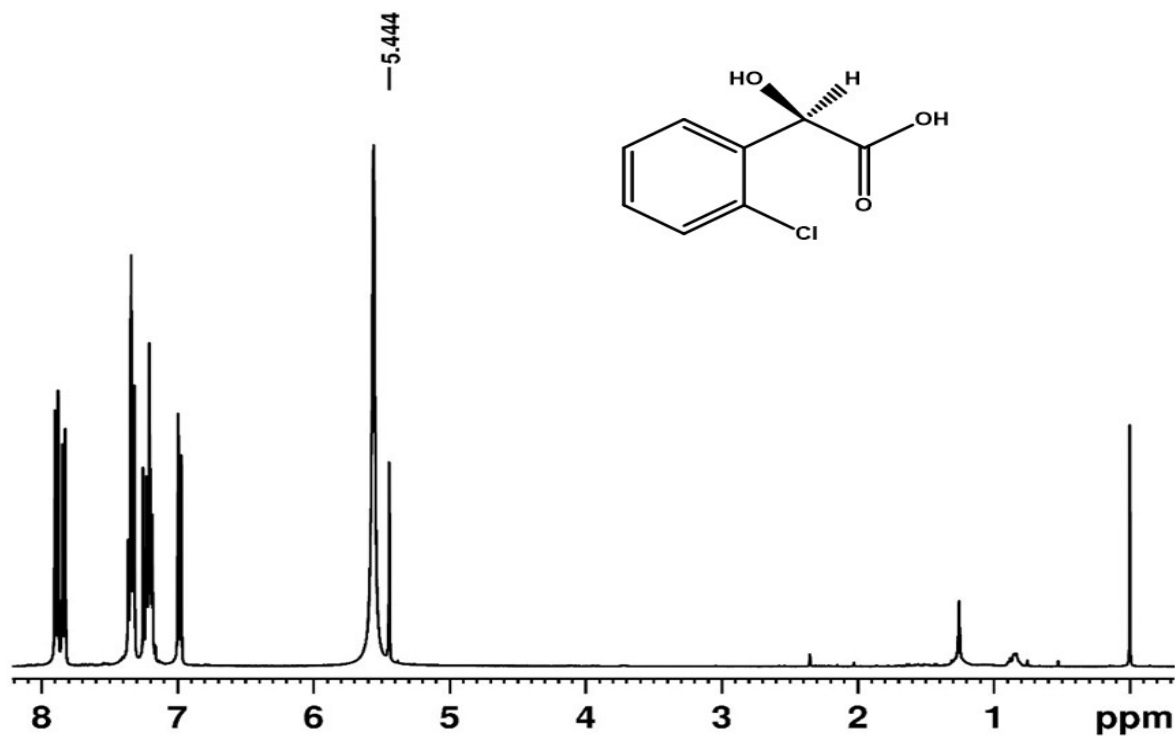

**Fig. S6:** 400 MHz  $^1\text{H-NMR}$  spectrum of *(S)*-BINAM, *(R)*-(-)-2-chloromandelic acid and TFMS in  $\text{CDCl}_3$ .

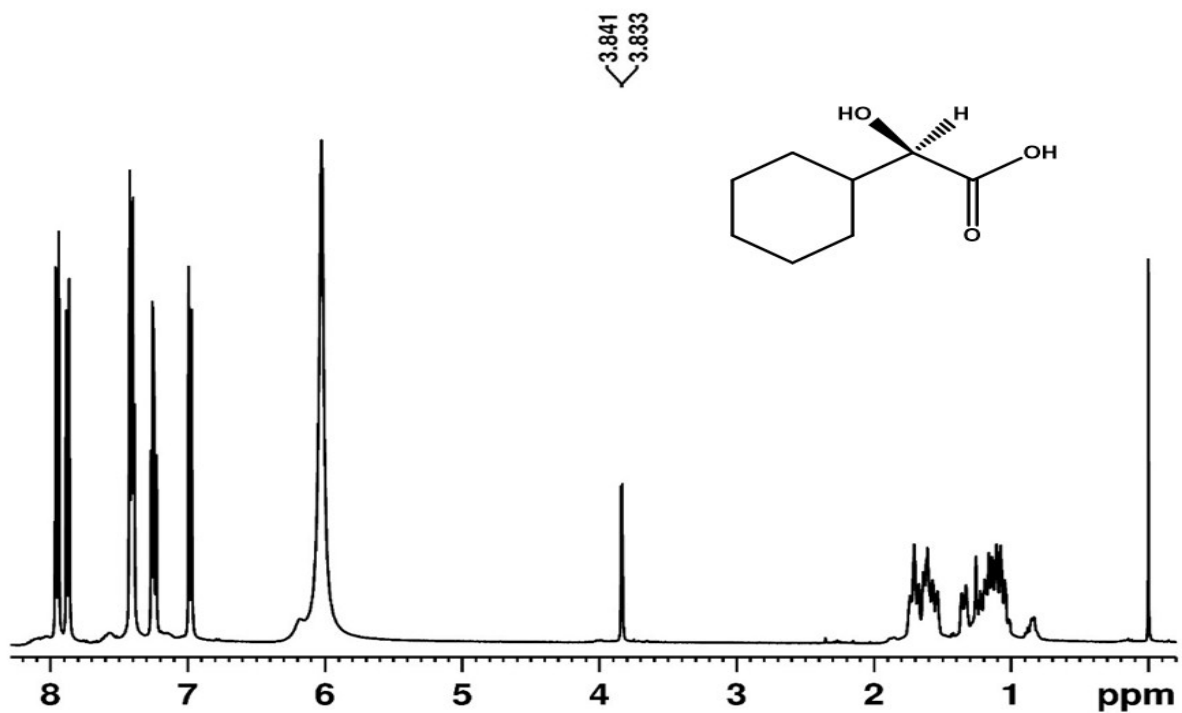

**Fig. S7:** 400 MHz  $^1\text{H-NMR}$  spectrum of *(R)*-BINAM, *(R)*-(-) hexahydroxymandelic acid and TFMS in  $\text{CDCl}_3$ .

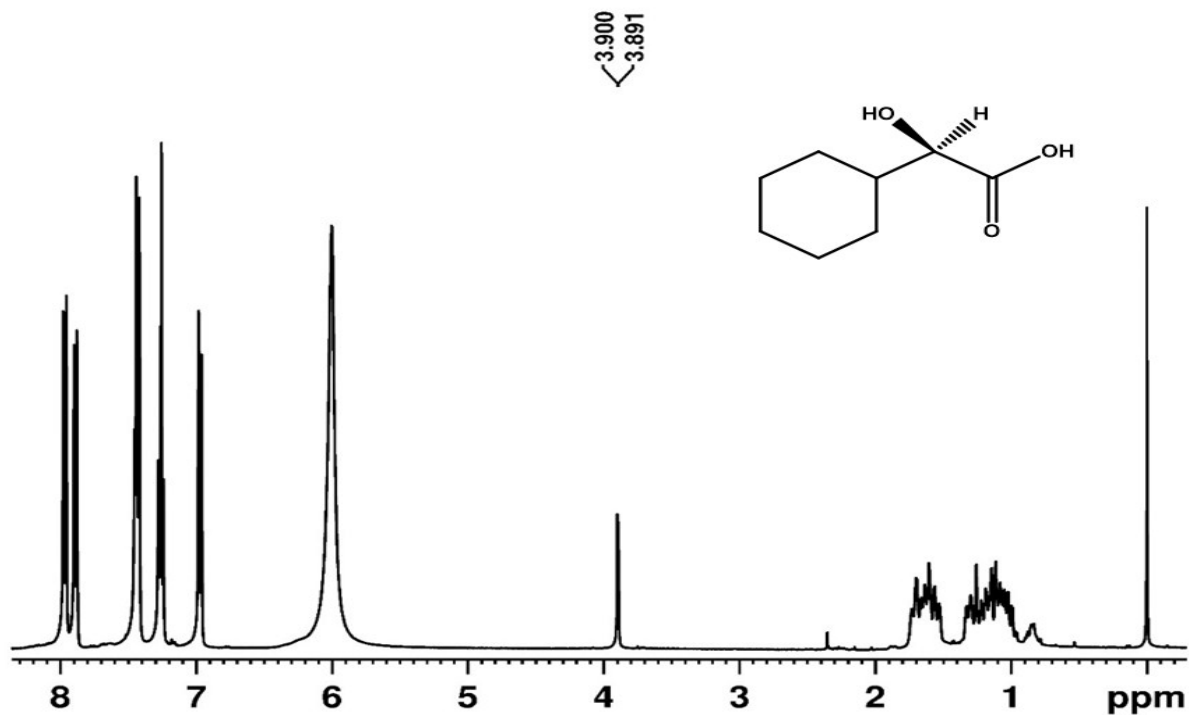

**Fig. S8:** 400 MHz  $^1\text{H-NMR}$  spectrum of *(S)*-BINAM, *(R)*-(-) hexahydroxymandelic acid and TFMS in  $\text{CDCl}_3$ .



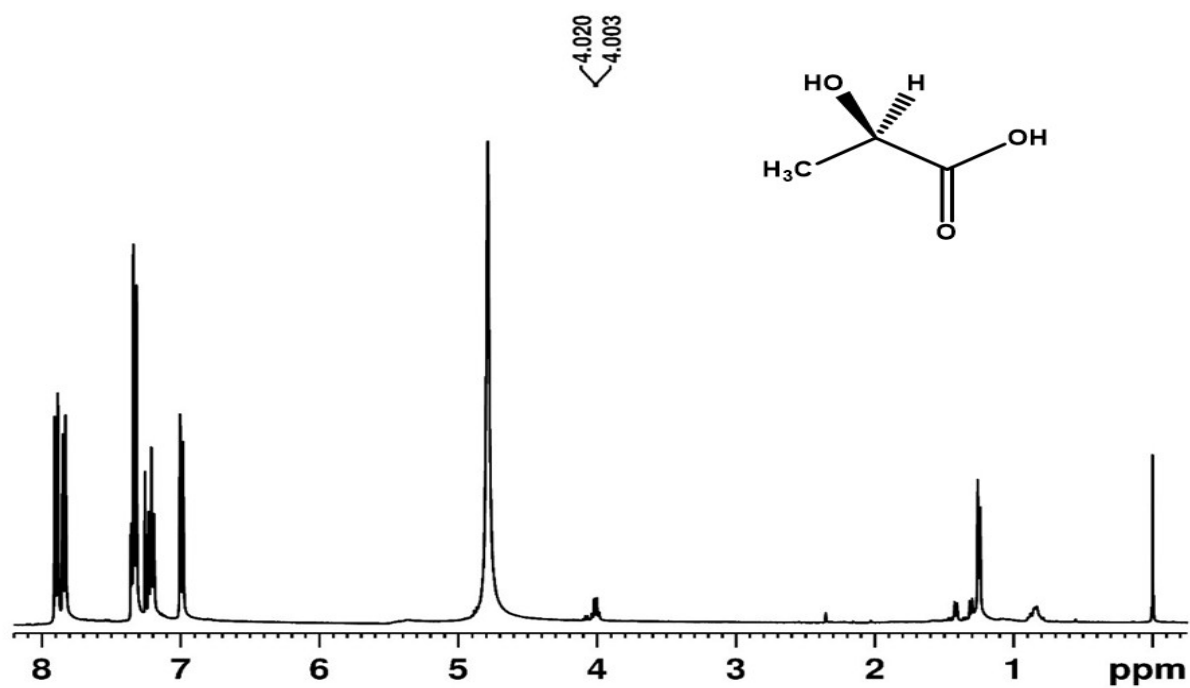

**Fig. S9:** 400 MHz  $^1\text{H}$ -NMR spectrum of (*R*)-BINAM, (*L*)-(+)-lactic acid and TFMS in  $\text{CDCl}_3$ .

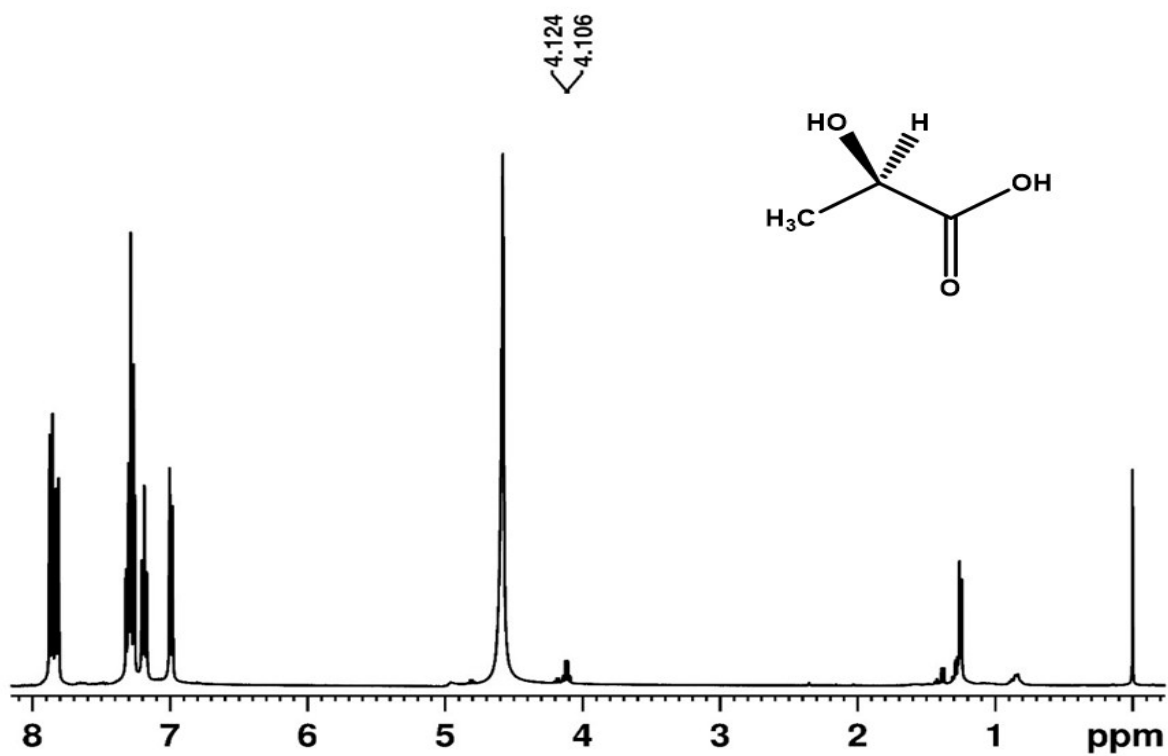

**Fig. S10:** 400 MHz  $^1\text{H}$ -NMR spectrum of (*S*)-BINAM, (*L*)-(+)-lactic acid and TFMS in  $\text{CDCl}_3$ .

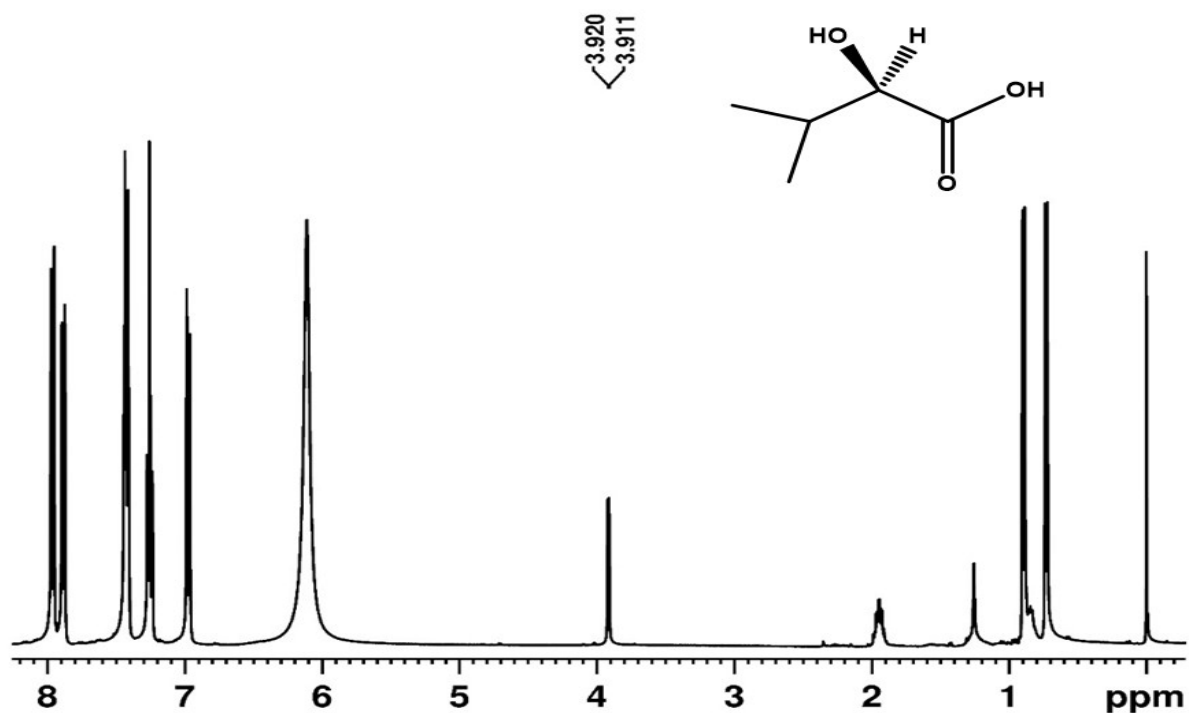

**Fig. S11:** 400 MHz <sup>1</sup>H-NMR spectrum of (R)-BINAM, (S)-(+)-2-hydroxy-3-methylbutyric acid and TFMS in CDCl<sub>3</sub>

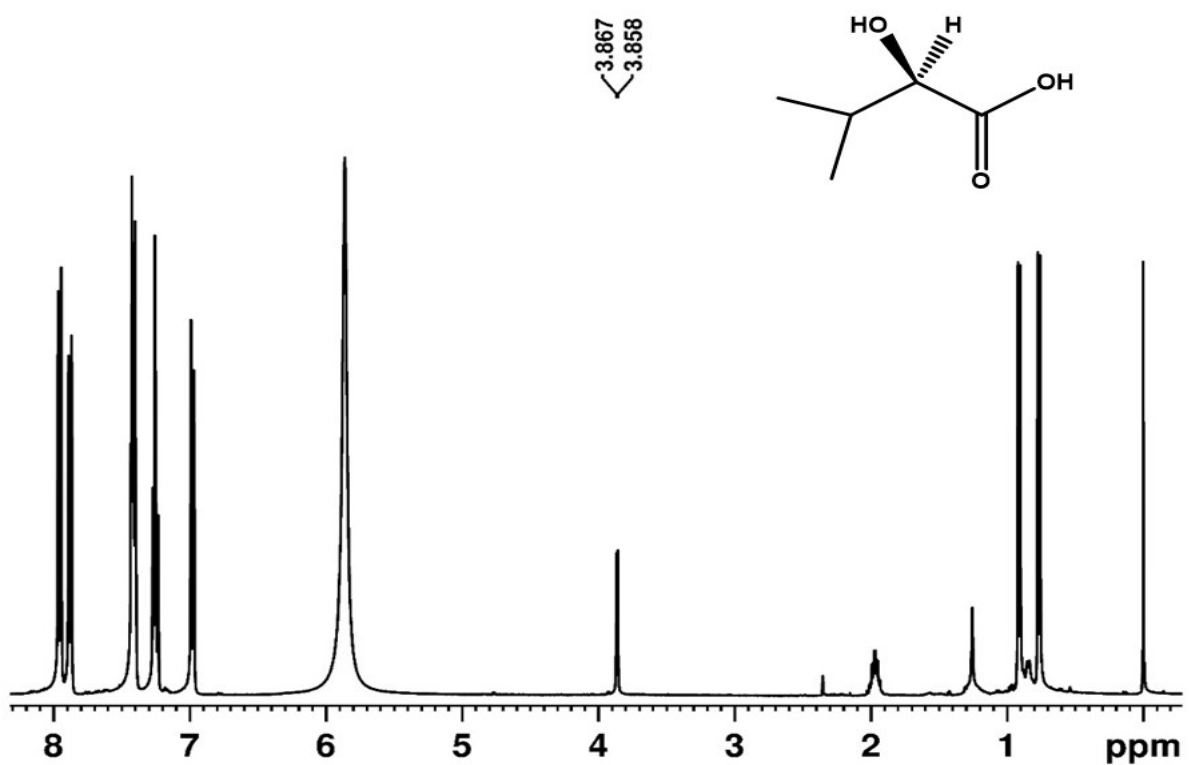

**Fig. S12:** 400 MHz <sup>1</sup>H-NMR spectrum of (S)-BINAM, (S)-(+)-2-hydroxy-3-methylbutyric acid and TFMS in CDCl<sub>3</sub>

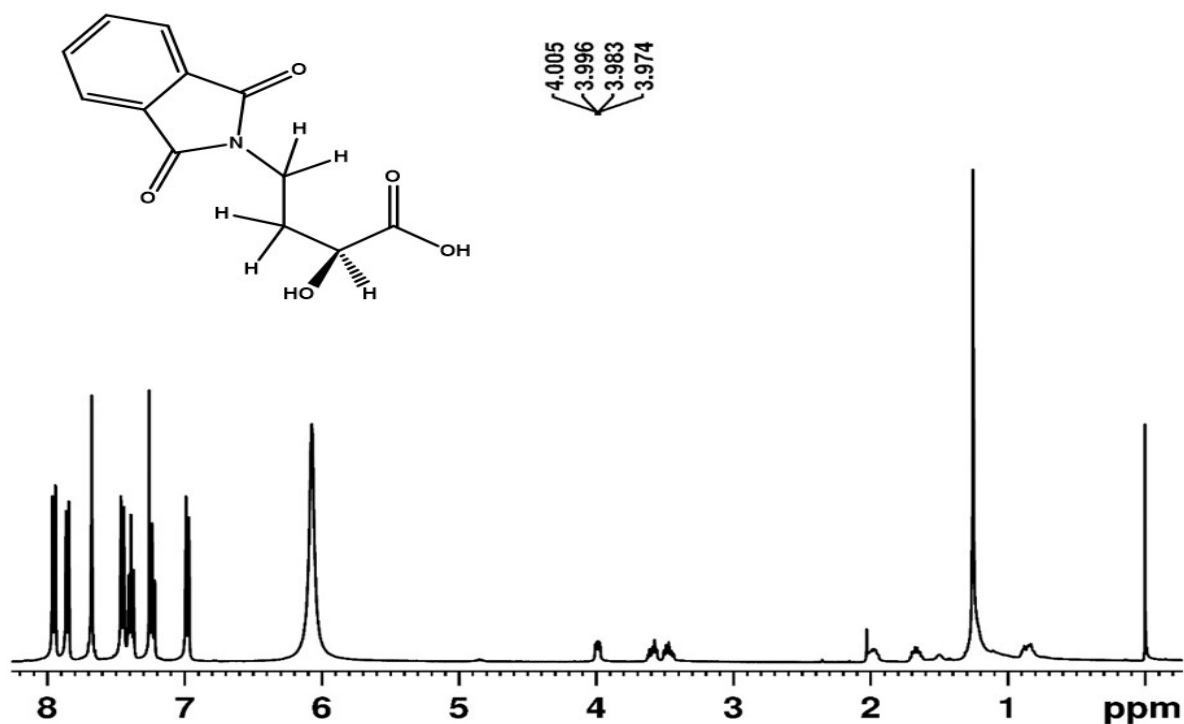

**Fig. S13:** 400 MHz  $^1\text{H}$ -NMR spectrum of (*R*)-BINAM, (*S*)-(+)- $\alpha$ -hydroxy-1,3-dioxo-2-isoisoindolinebutyric acid and TFMS in  $\text{CDCl}_3$

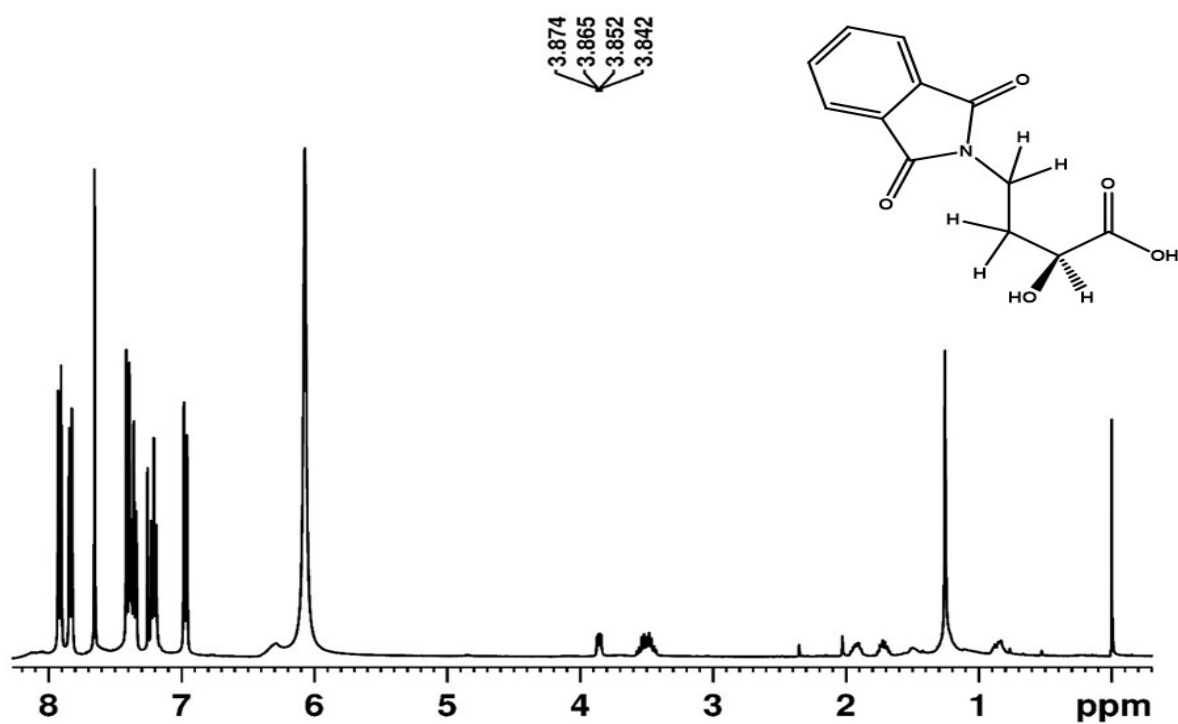

**Fig. S14:** 400 MHz  $^1\text{H}$ -NMR spectrum of (*S*)-BINAM, (*S*)-(+)- $\alpha$ -hydroxy-1,3-dioxo-2-isoisoindolinebutyric acid and TFMS in  $\text{CDCl}_3$

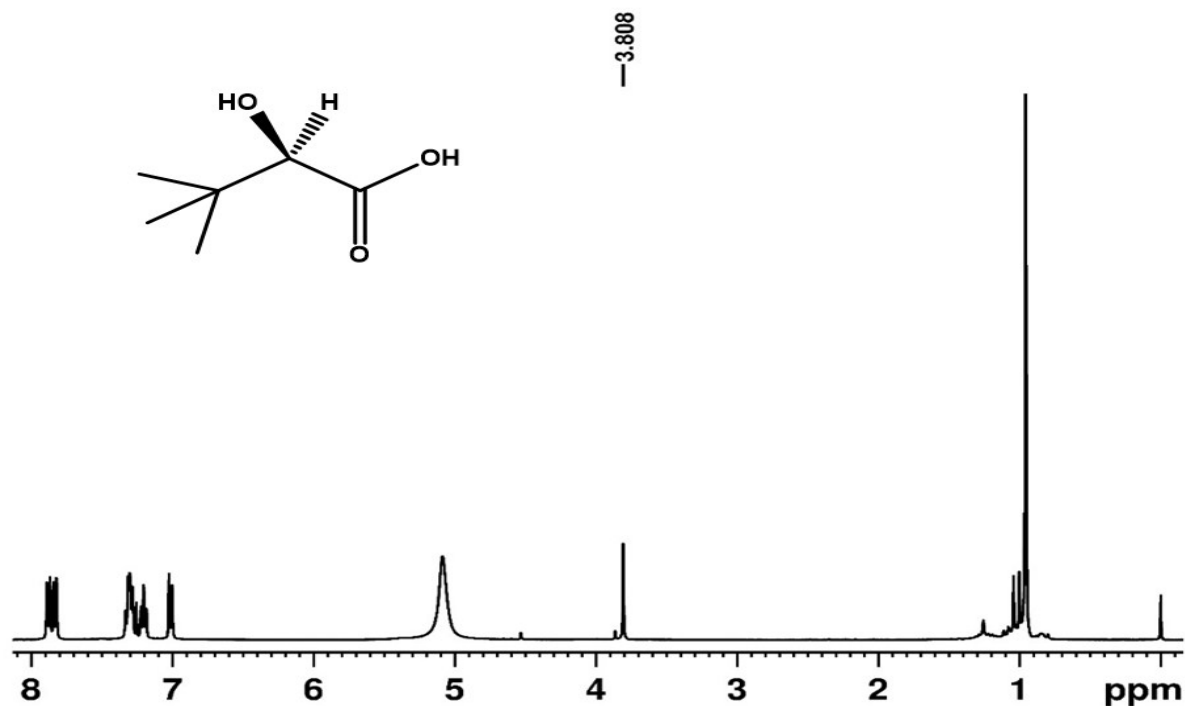

**Fig. S15:** 400 MHz  $^1\text{H}$ -NMR spectrum of (*R*)-BINAM, (*S*)-(-)-3-hydroxy-3,3 dimethylbutanoic acid and TFMS in  $\text{CDCl}_3$

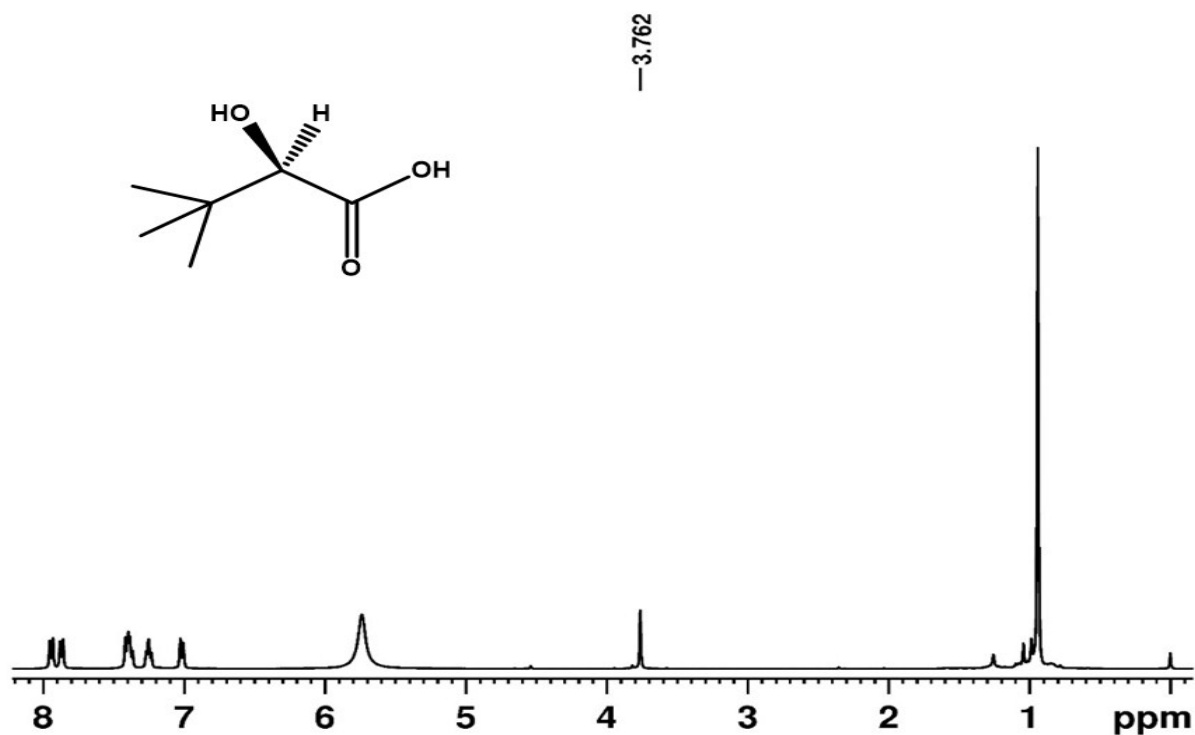

**Fig. S16:** 400 MHz  $^1\text{H}$ -NMR spectrum of (*S*)-BINAM, (*S*)-(-)-3-hydroxy-3,3 dimethylbutanoic acid and TFMS in  $\text{CDCl}_3$

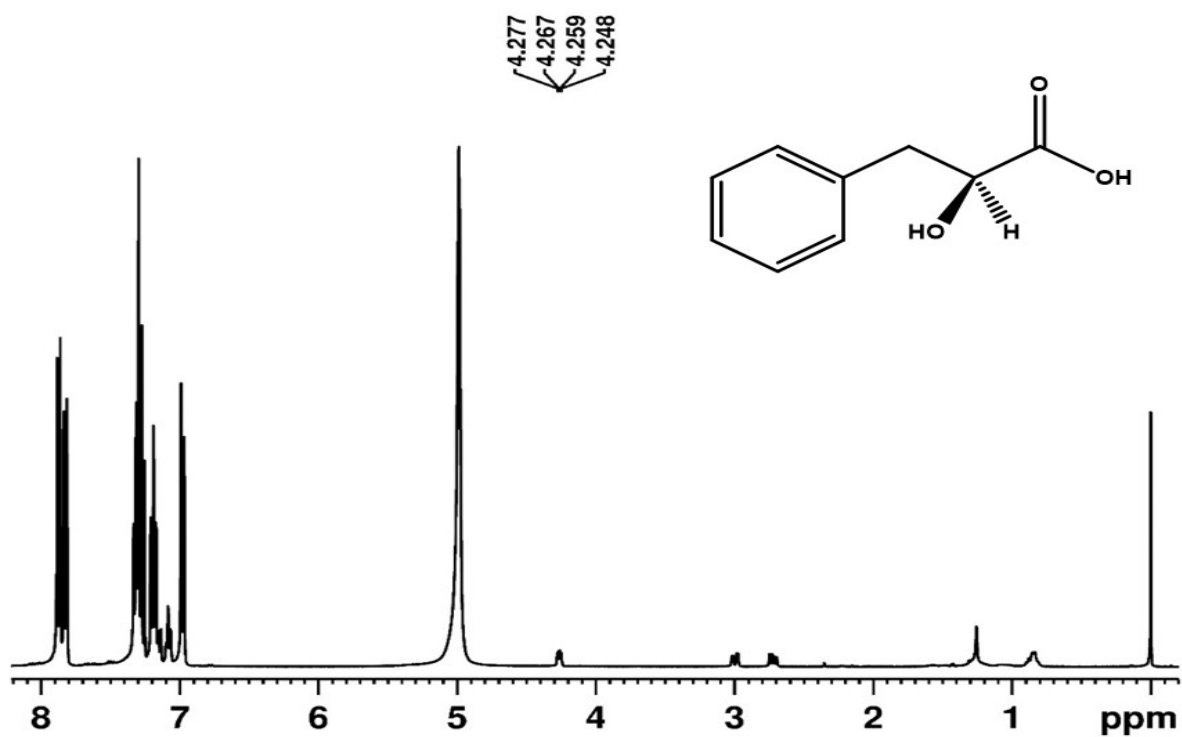

**Fig. S17:** 400 MHz  $^1\text{H-NMR}$  spectrum of (*R*)-BINAM, (*L*)-(-)-3-phenyllactic acid and TFMS in  $\text{CDCl}_3$

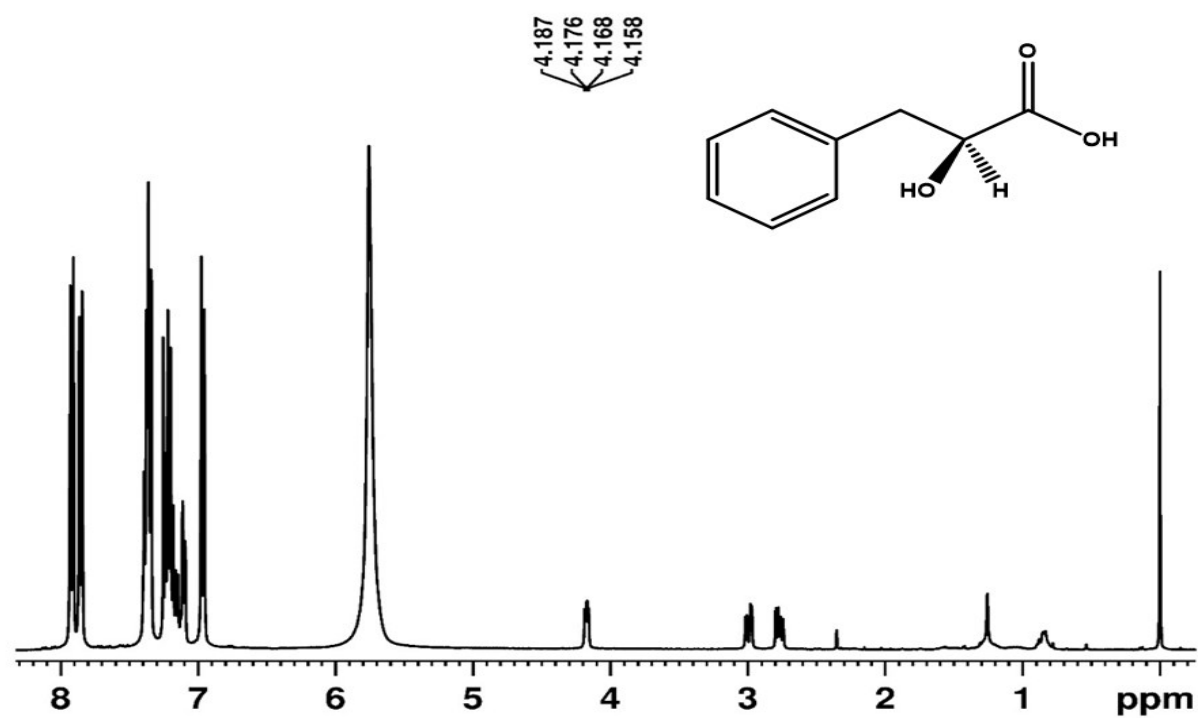

**Fig. S18:** 400 MHz  $^1\text{H-NMR}$  spectrum of (*S*)-BINAM, (*L*)-(-)-3-phenyllactic acid and TFMS in  $\text{CDCl}_3$

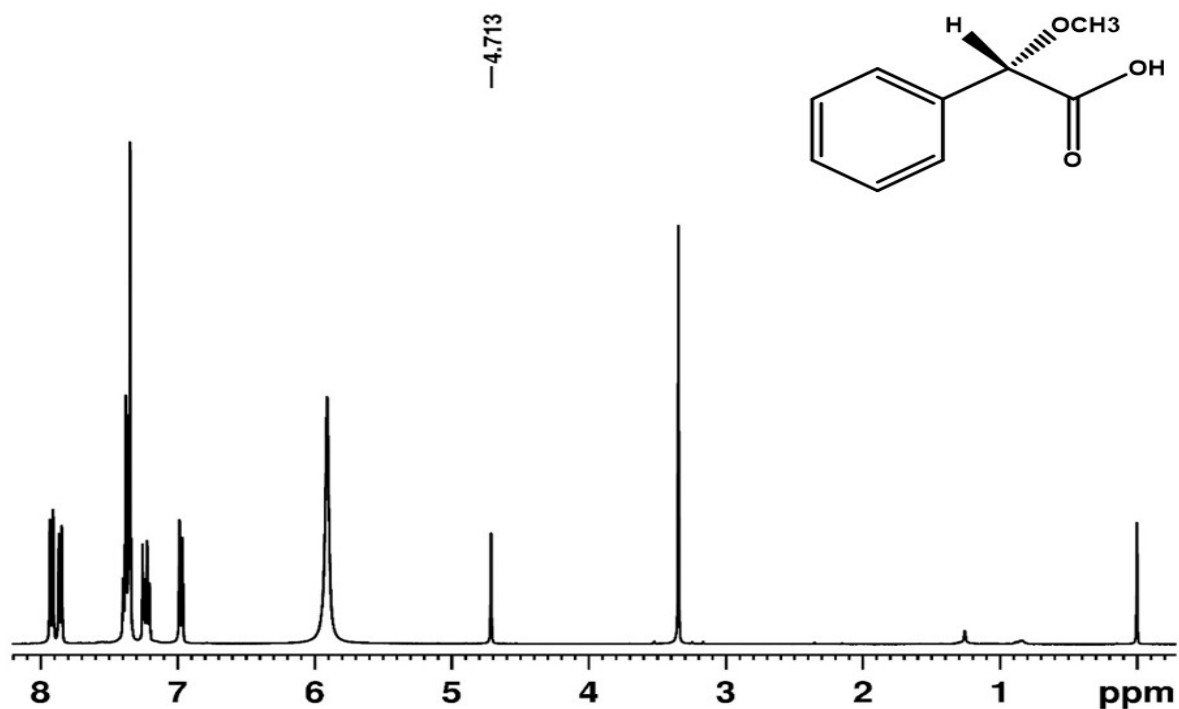

**Fig. S19:** 400 MHz  $^1\text{H}$ -NMR spectrum of (*R*)-BINAM, (*S*)-(+)- $\alpha$ -methoxyphenylacetic acid and TFMS in  $\text{CDCl}_3$

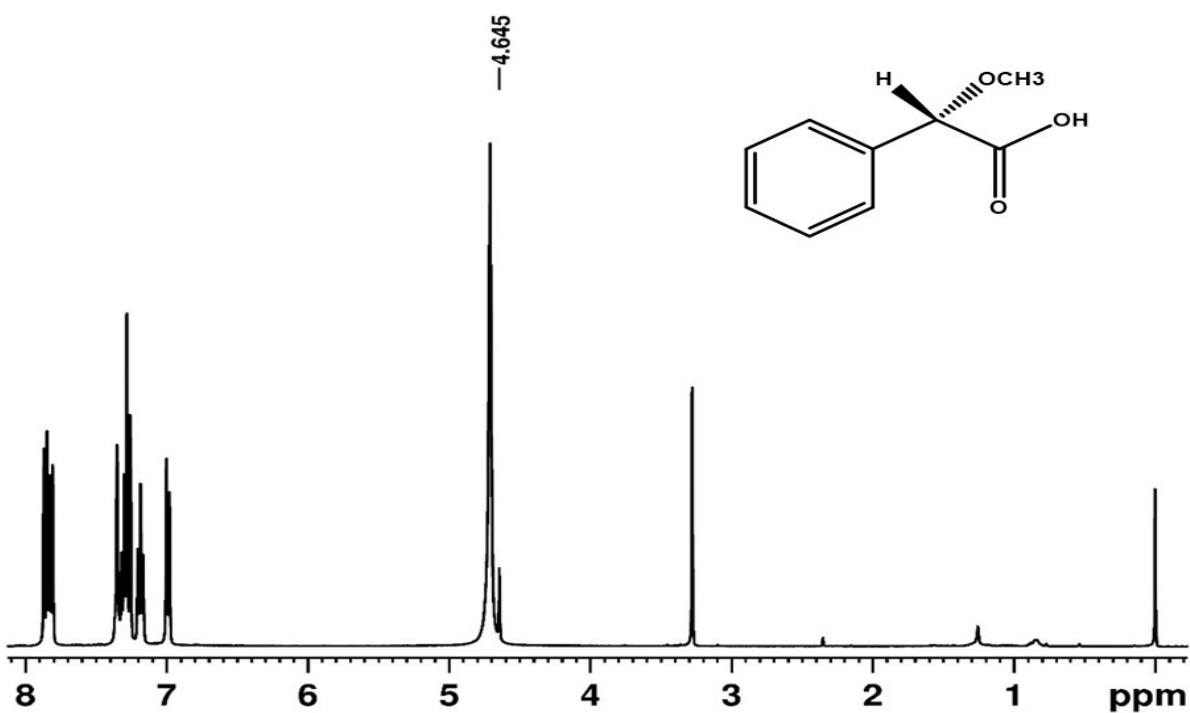

**Fig. S20:** 400 MHz  $^1\text{H}$ -NMR spectrum of (*S*)-BINAM, (*S*)-(+)- $\alpha$ -methoxyphenylacetic acid and TFMS in  $\text{CDCl}_3$

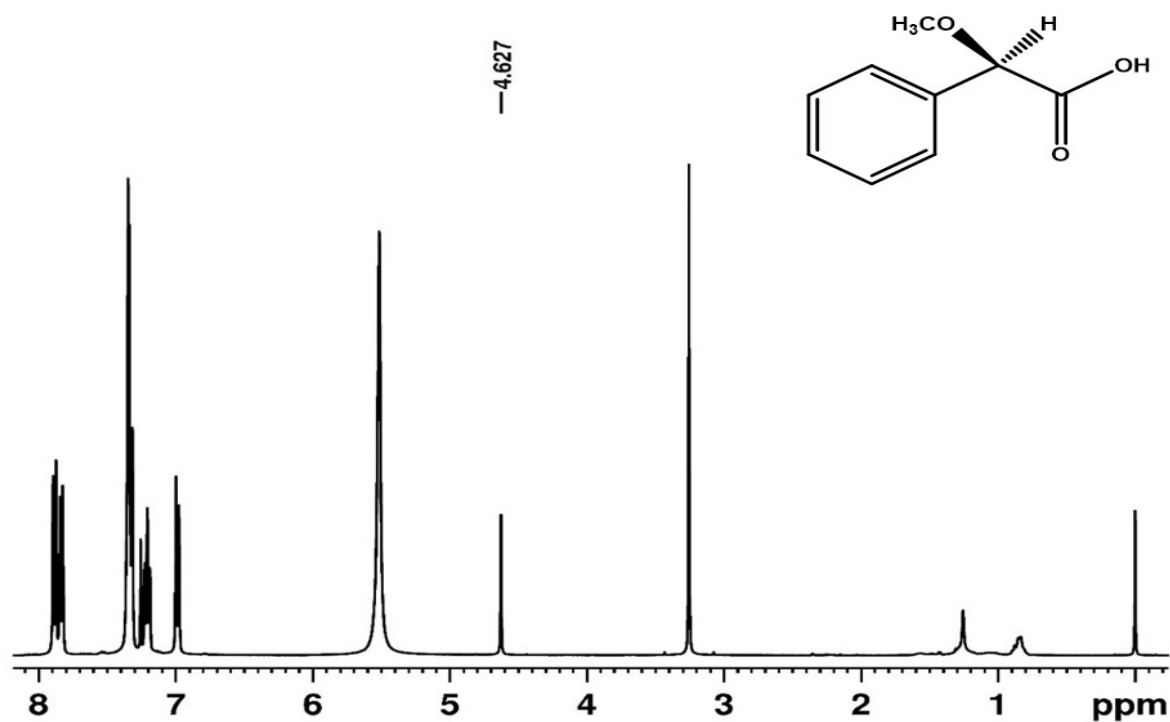

**Fig. S21:** 400 MHz  $^1\text{H}$ -NMR spectrum of *(R)*-BINAM, *(R)*-(-)- $\alpha$ -methoxyphenylacetic acid and TFMS in  $\text{CDCl}_3$

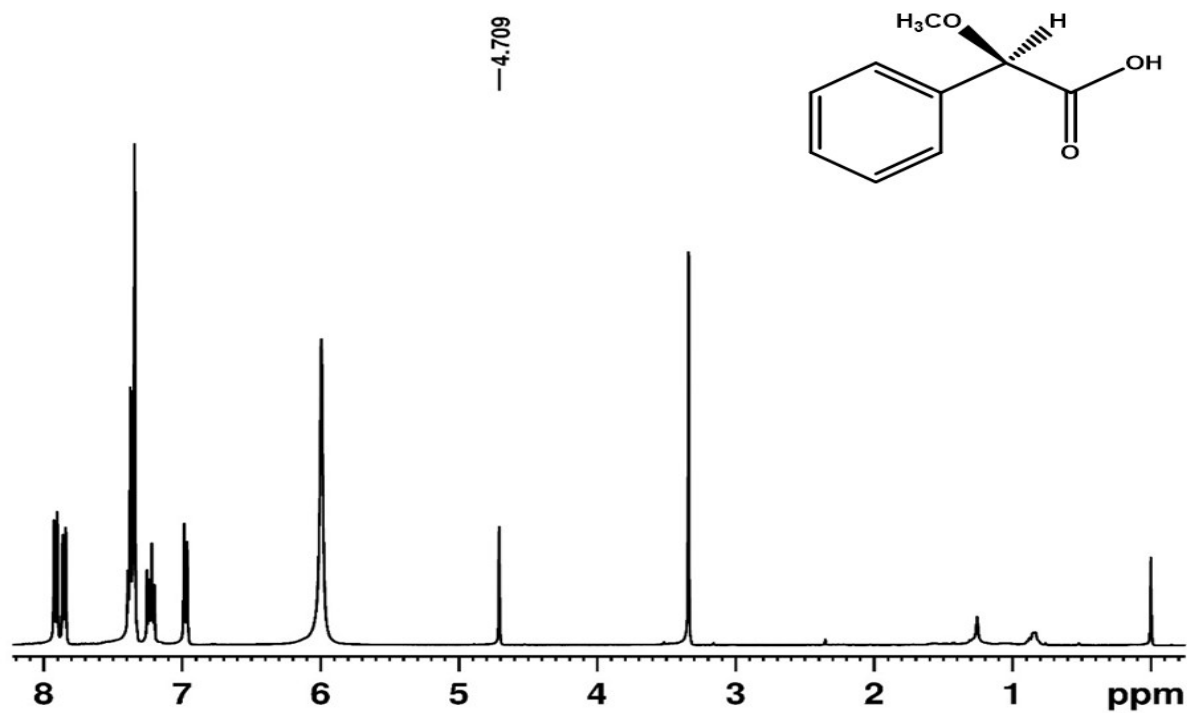

**Fig. S22:** 400 MHz  $^1\text{H}$ -NMR spectrum of *(S)*-BINAM, *(R)*-(-)- $\alpha$ -methoxyphenylacetic acid and TFMS in  $\text{CDCl}_3$

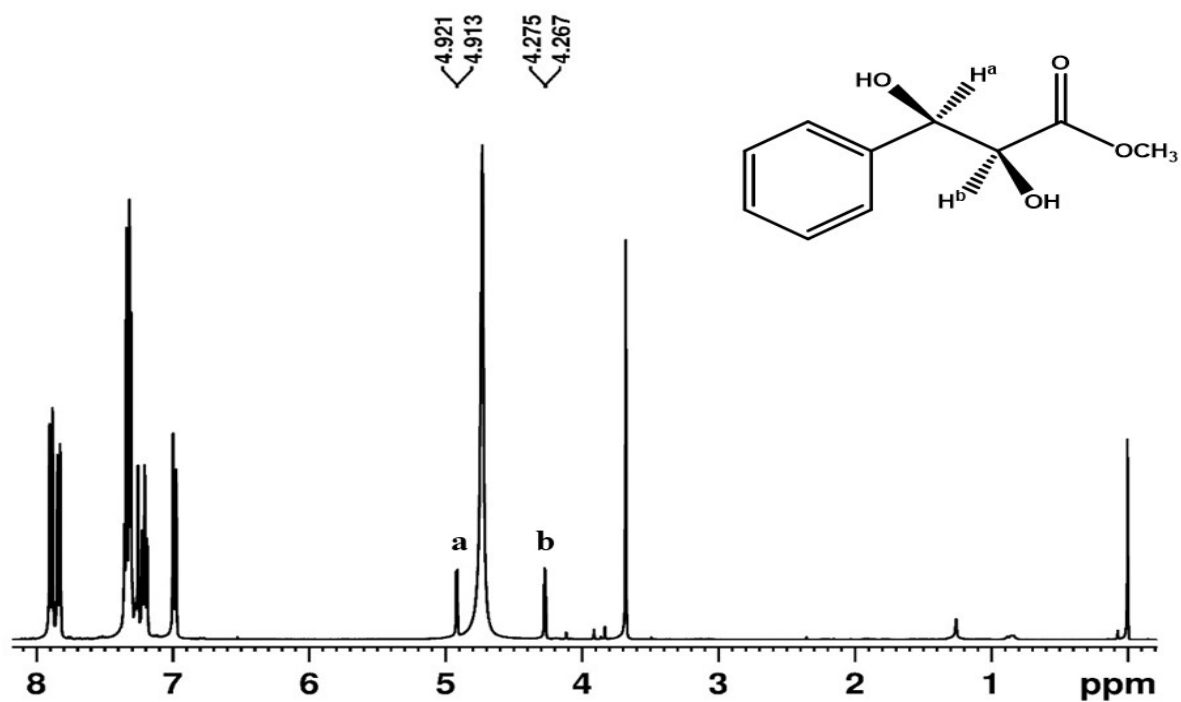

**Fig. S23:** 400 MHz <sup>1</sup>H-NMR spectrum of (*R*)-BINAM, Methyl (2*S*,3*R*)-(-)-2,3-dihydroxy-3-phenylpropionate and TFMS in CDCl<sub>3</sub>

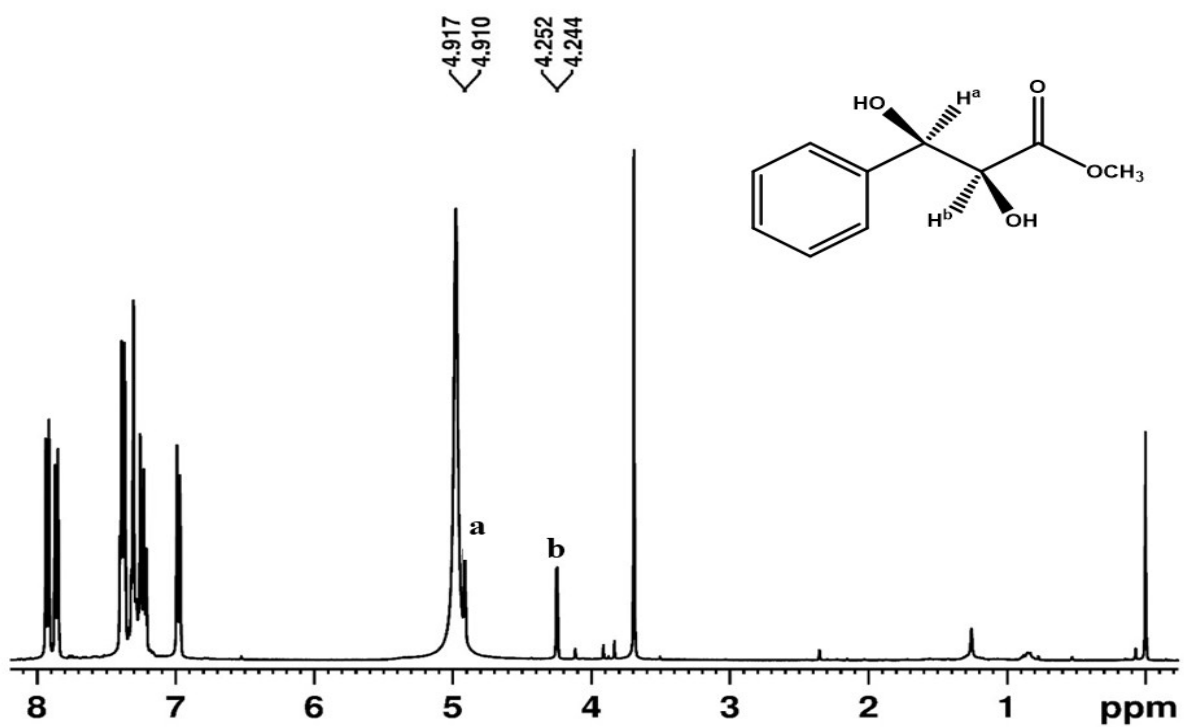

**Fig. S24:** 400 MHz <sup>1</sup>H-NMR spectrum of (*S*)-BINAM, Methyl (2*S*,3*R*)-(-)-2,3-dihydroxy-3-phenylpropionate and TFMS in CDCl<sub>3</sub>



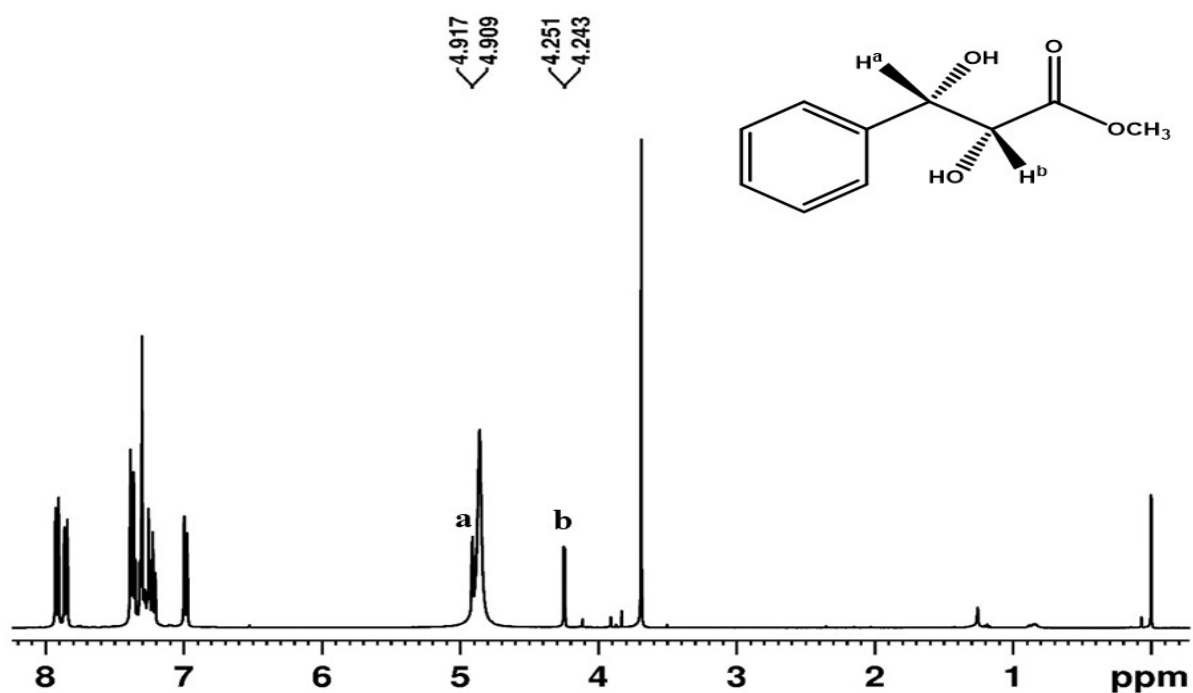

**Fig. S25:** 400 MHz  $^1\text{H}$ -NMR spectrum of (*R*)-BINAM, Methyl (2*R*,3*S*)-(+)-2,3-dihydroxy-3-phenylpropionate and TFMS in  $\text{CDCl}_3$

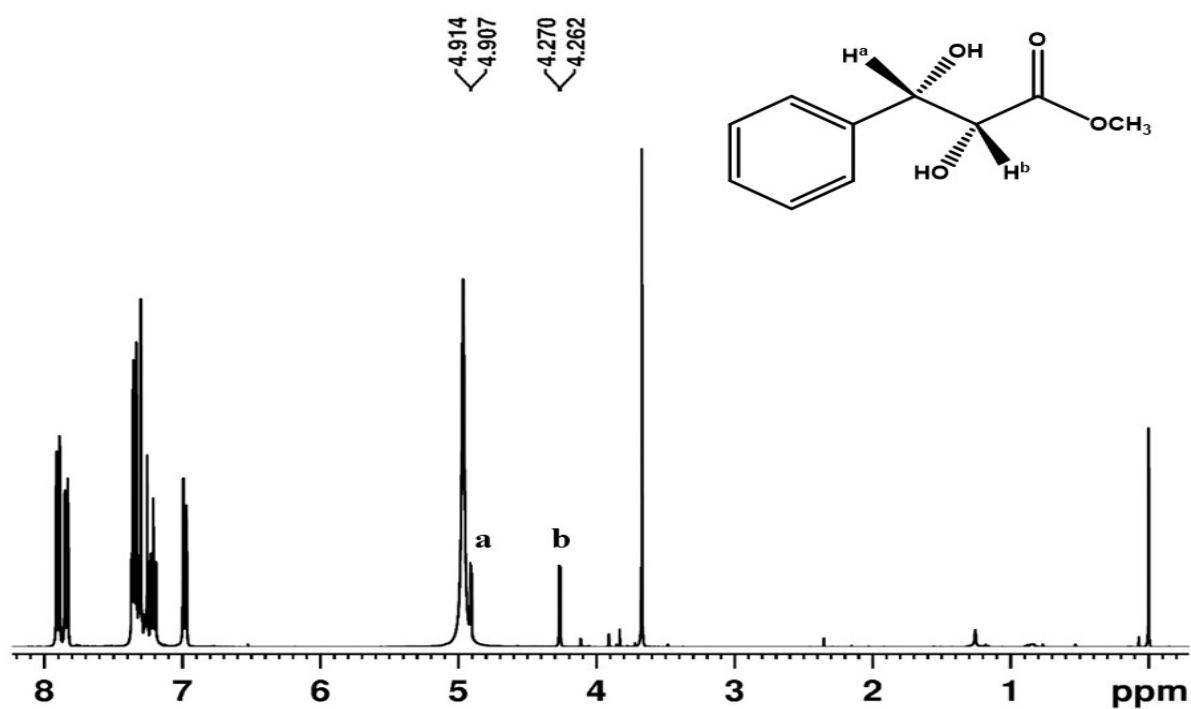

**Fig. S26:** 400 MHz  $^1\text{H}$ -NMR spectrum of (*S*)-BINAM, Methyl (2*R*,3*S*)-(+)-2,3-dihydroxy-3-phenylpropionate and TFMS in  $\text{CDCl}_3$

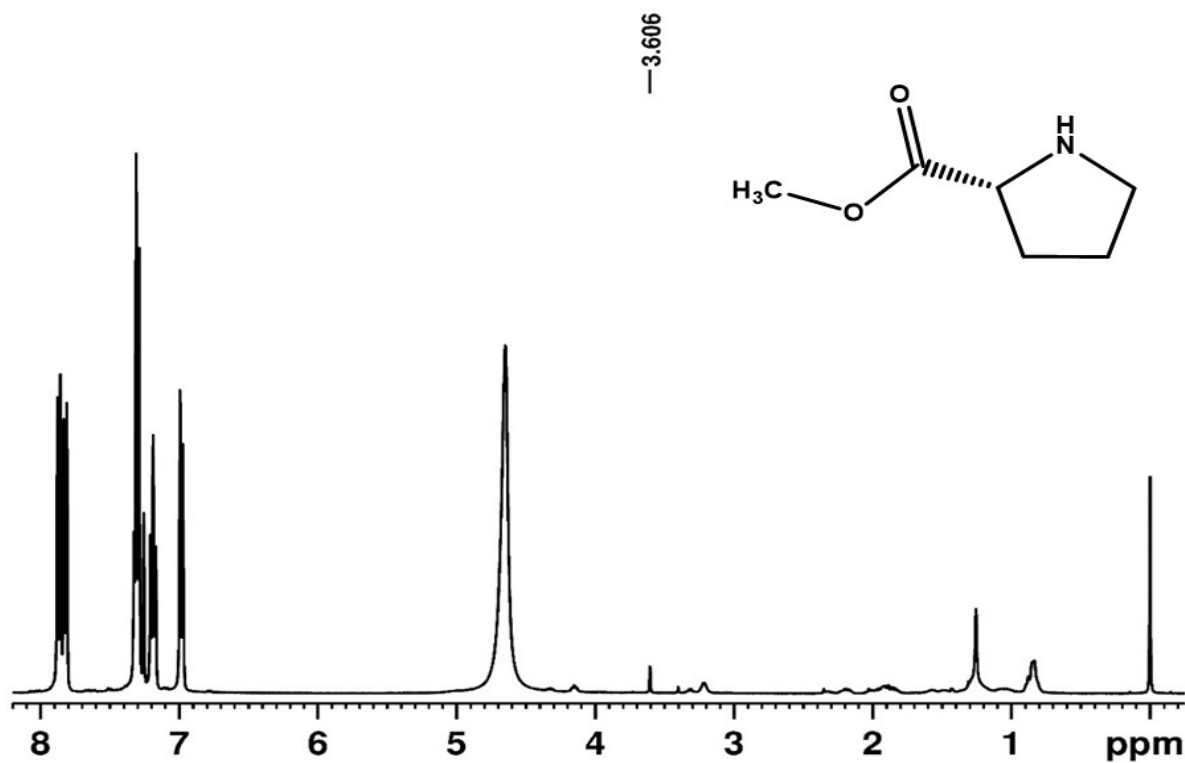

**Fig. S27:** 400 MHz  $^1\text{H}$ -NMR spectrum of (*R*)-BINAM, (*R*)-pyrrolidine-2-carboxylic acid methyl ester and TFMS in  $\text{CDCl}_3$

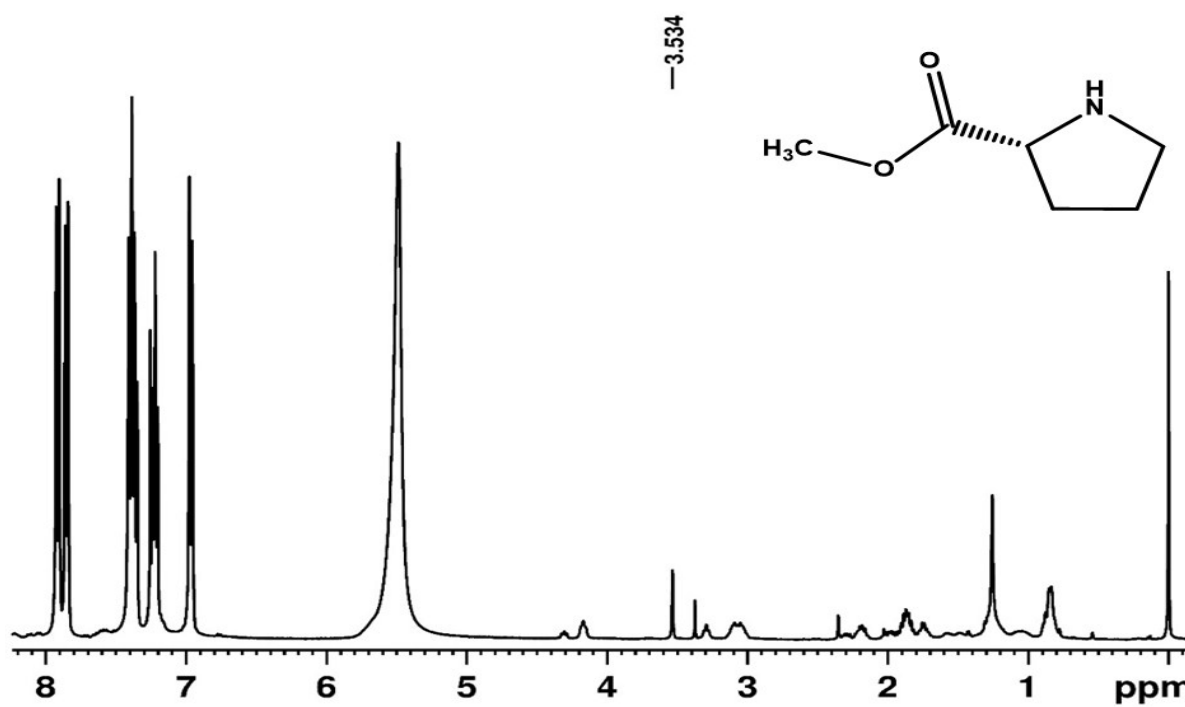

**Fig. S28:** 400 MHz  $^1\text{H}$ -NMR spectrum of (*S*)-BINAM, (*R*)-pyrrolidine-2-carboxylic acid methyl ester and TFMS in  $\text{CDCl}_3$

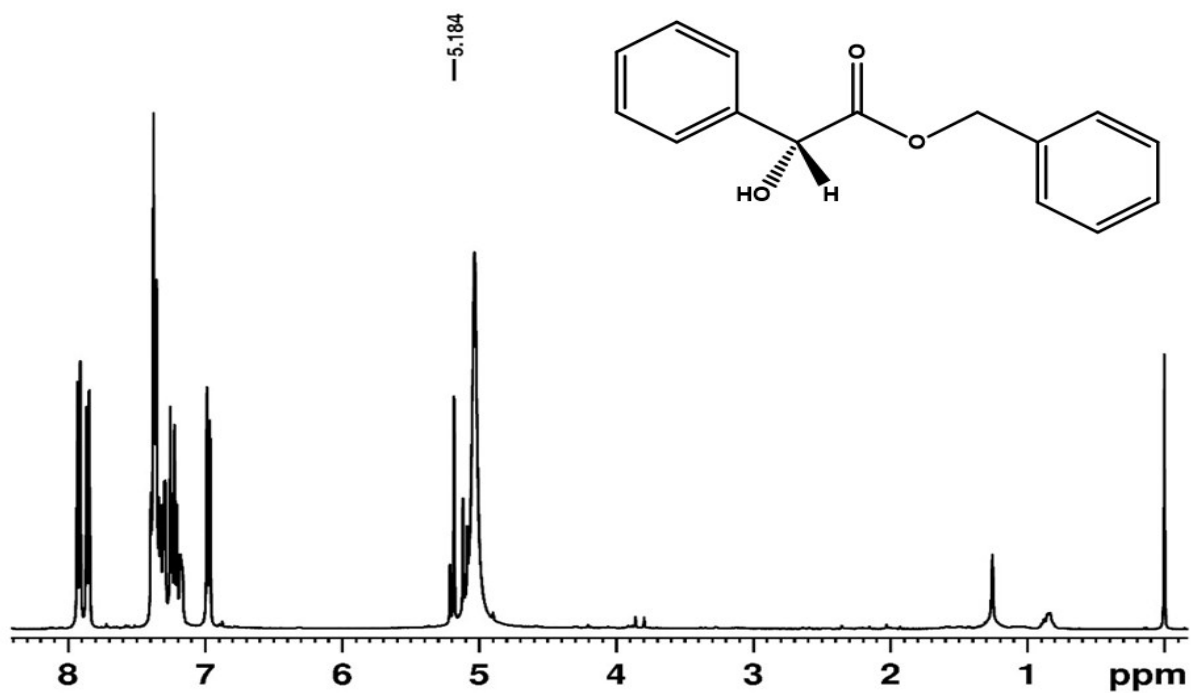

**Fig. S29:** 400 MHz  $^1\text{H}$ -NMR spectrum of (*R*)-BINAM, Benzyl (*R*)-(-)-mandelate and TFMS in  $\text{CDCl}_3$

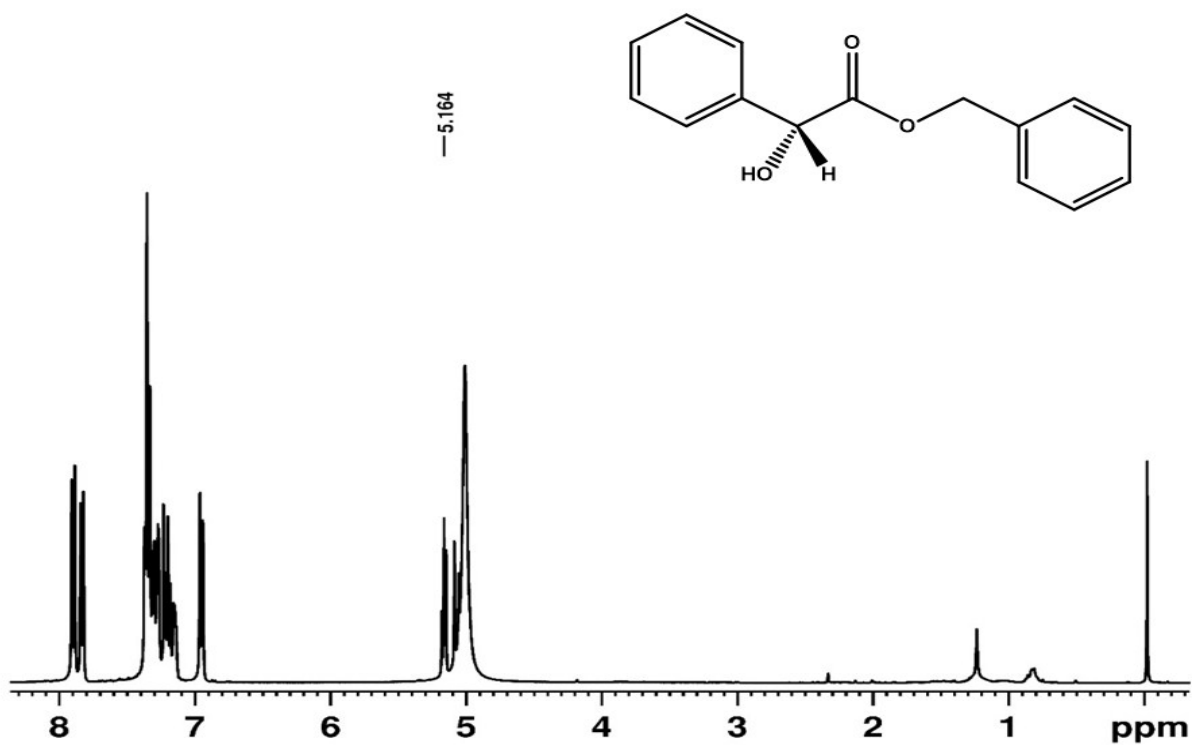

**Fig. S30:** 400 MHz  $^1\text{H}$ -NMR spectrum of (*S*)-BINAM, Benzyl (*R*)-(-)-mandelate and TFMS in  $\text{CDCl}_3$

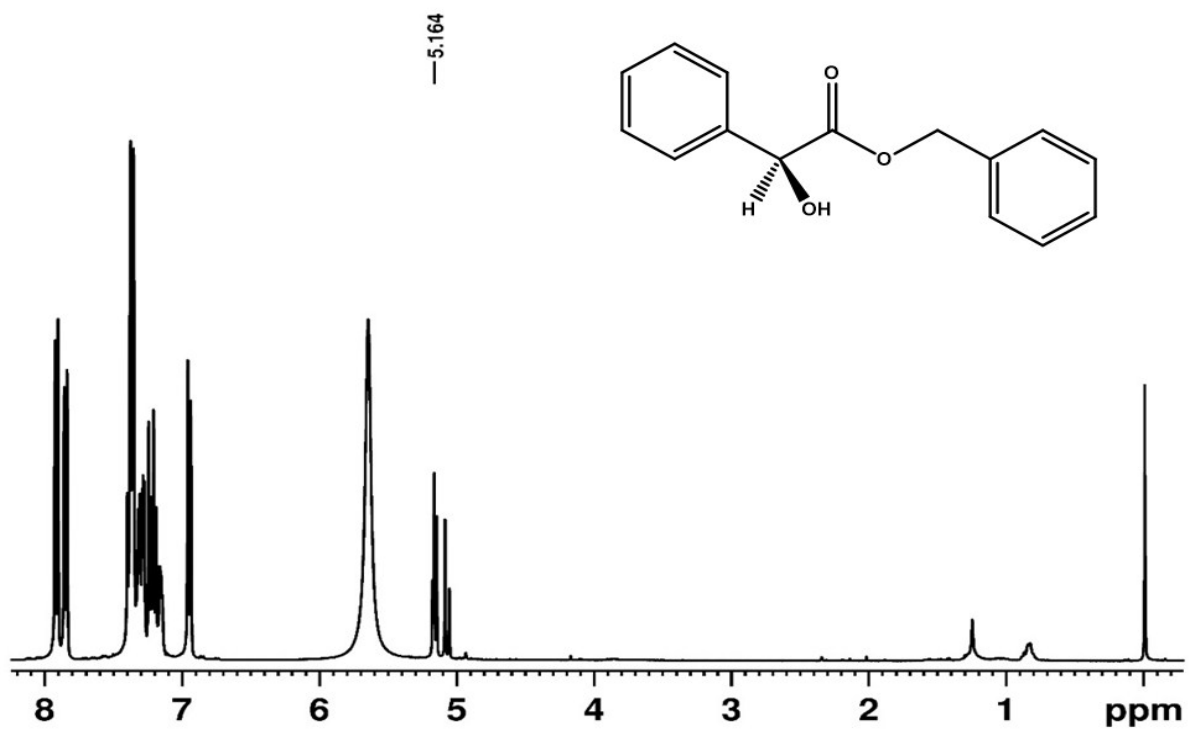

**Fig. S31:** 400 MHz <sup>1</sup>H-NMR spectrum of (*R*)-BINAM, Benzyl (*S*)-(+)-mandelate and TFMS in CDCl<sub>3</sub>

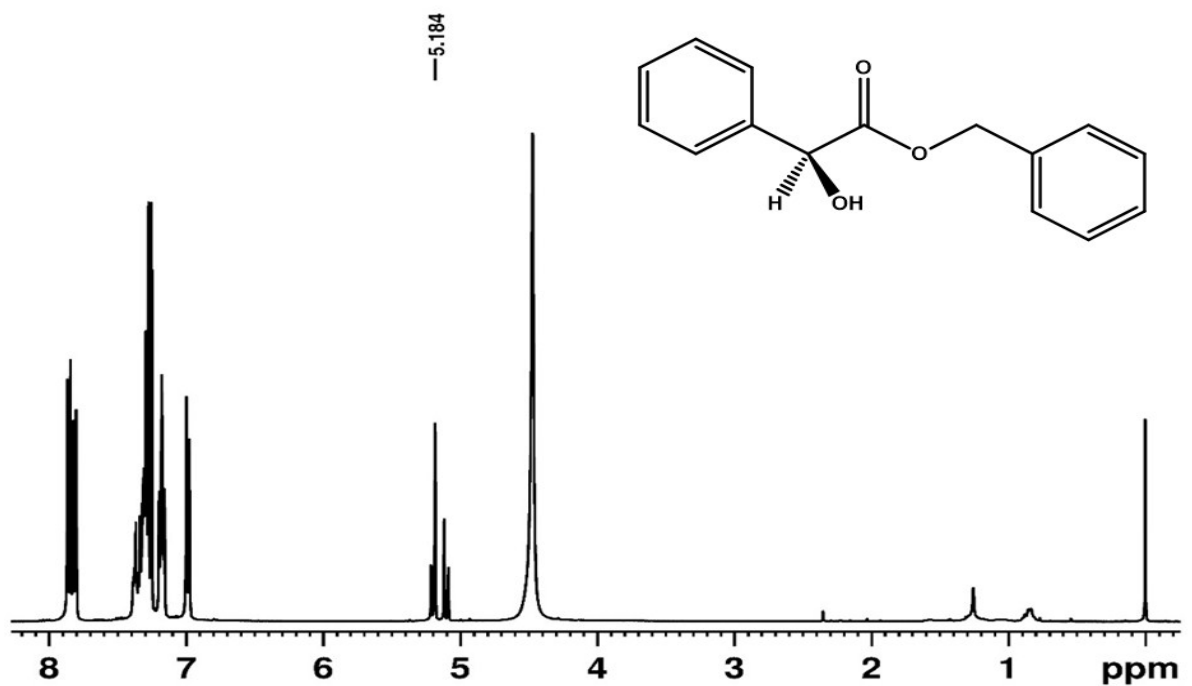

**Fig. S32:** 400 MHz <sup>1</sup>H-NMR spectrum of (*S*)-BINAM, Benzyl (*S*)-(+)-mandelate and TFMS in CDCl<sub>3</sub>

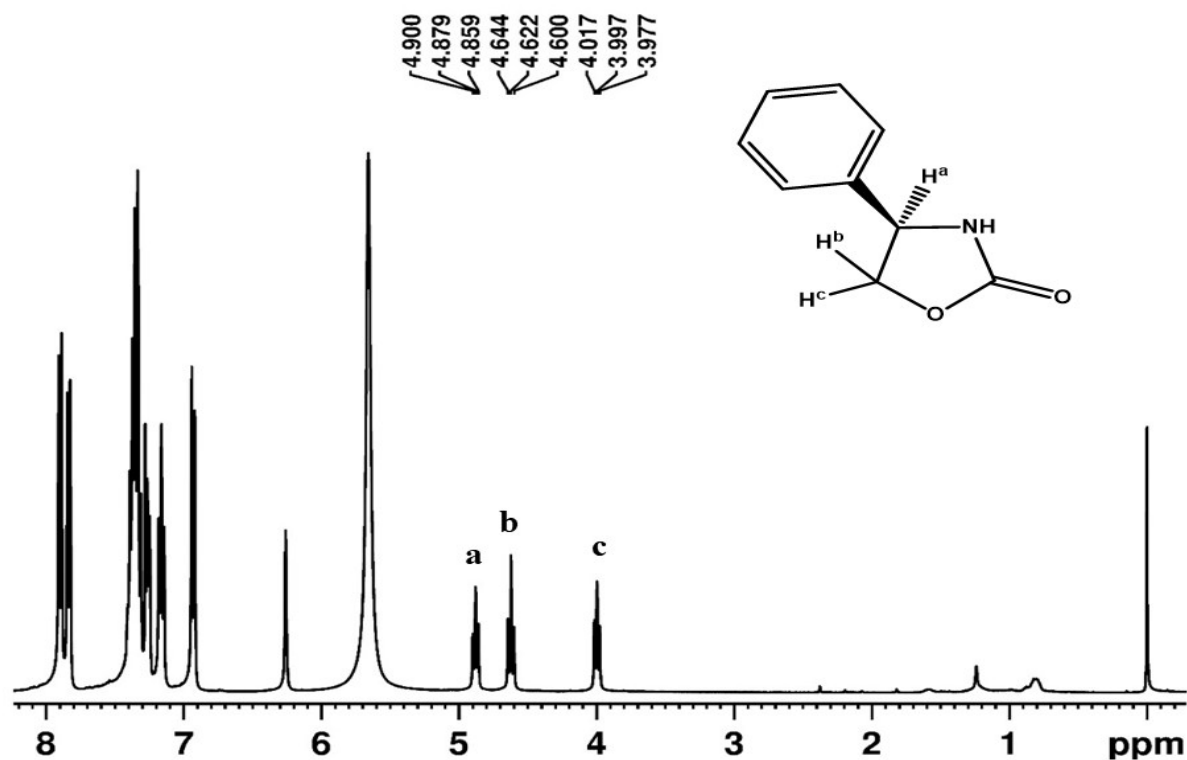

**Fig. S33:** 400 MHz  $^1\text{H}$ -NMR spectrum of (*R*)-BINAM, (*R*)-(-)-4-phenyl-2-oxazolidinone and TFMS in  $\text{CDCl}_3$

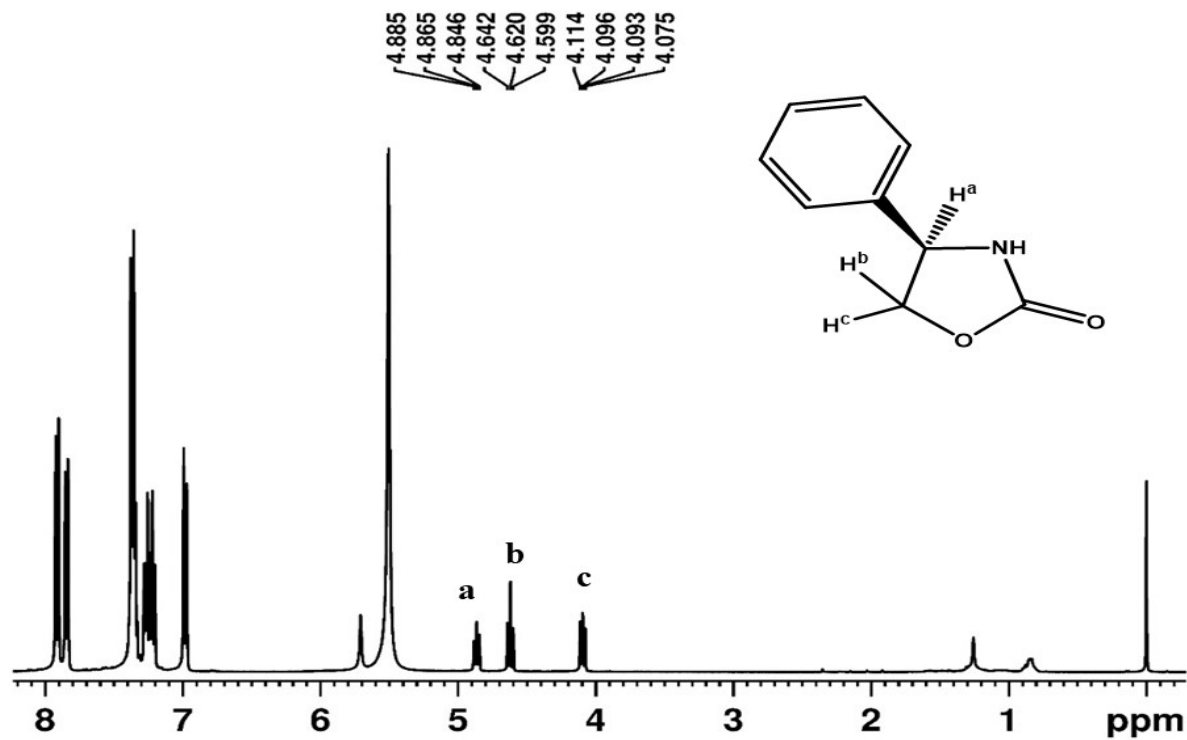

**Fig. S34:** 30400 MHz  $^1\text{H}$ -NMR spectrum of (*S*)-BINAM, (*R*)-(-)-4-phenyl-2-oxazolidinone and TFMS in  $\text{CDCl}_3$

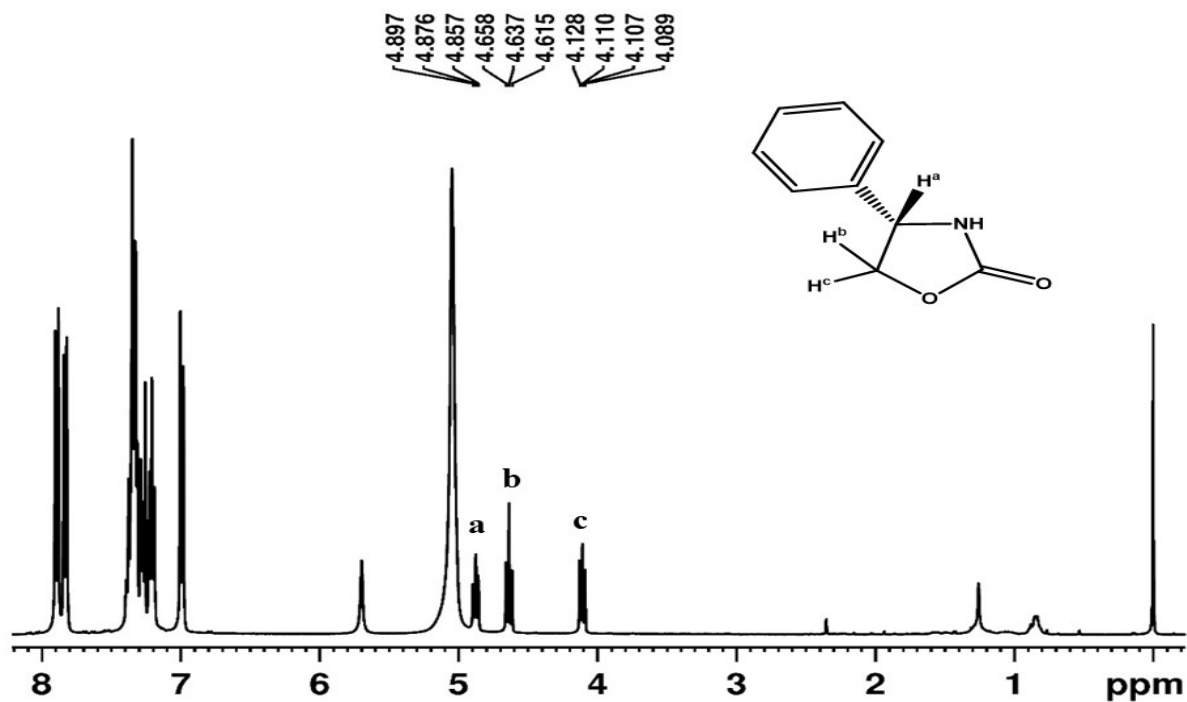

**Fig. S35:** 400 MHz  $^1\text{H}$ -NMR spectrum of (*R*)-BINAM, (*S*)-(+)-4-phenyl-2-oxazolidinone and TFMS in  $\text{CDCl}_3$

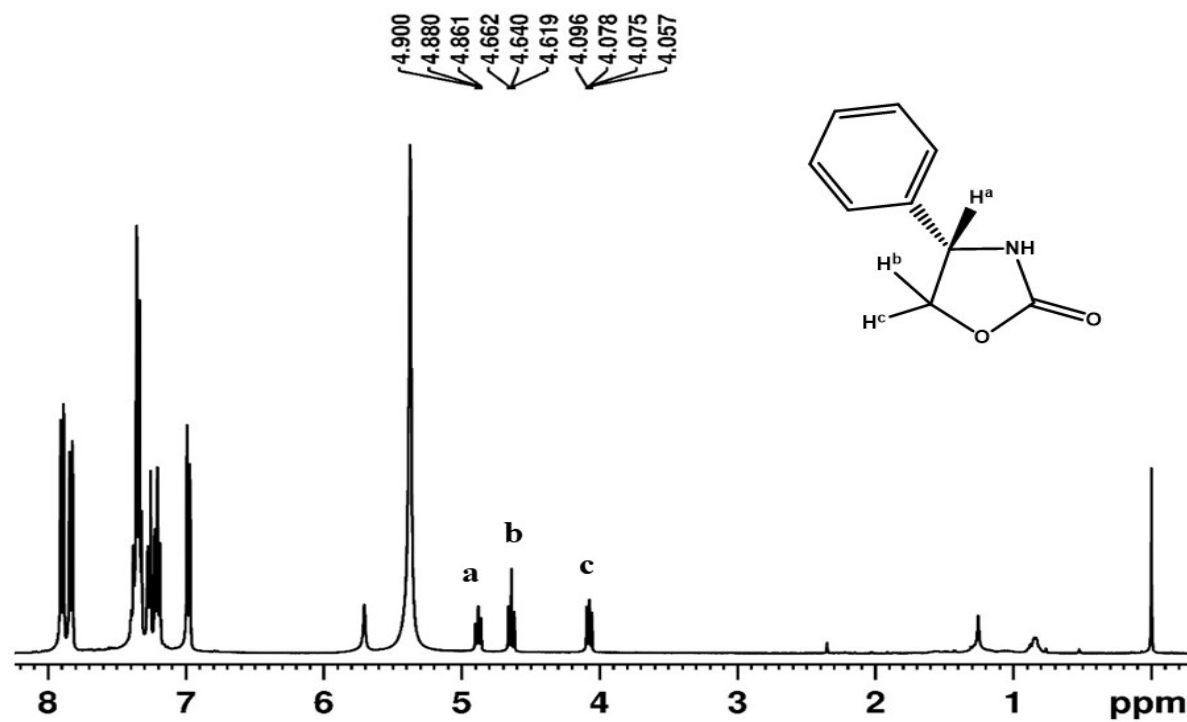

**Fig. S36:** 400 MHz  $^1\text{H}$ -NMR spectrum of (*S*)-BINAM, (*S*)-(+)-4-phenyl-2-oxazolidinone and TFMS in  $\text{CDCl}_3$

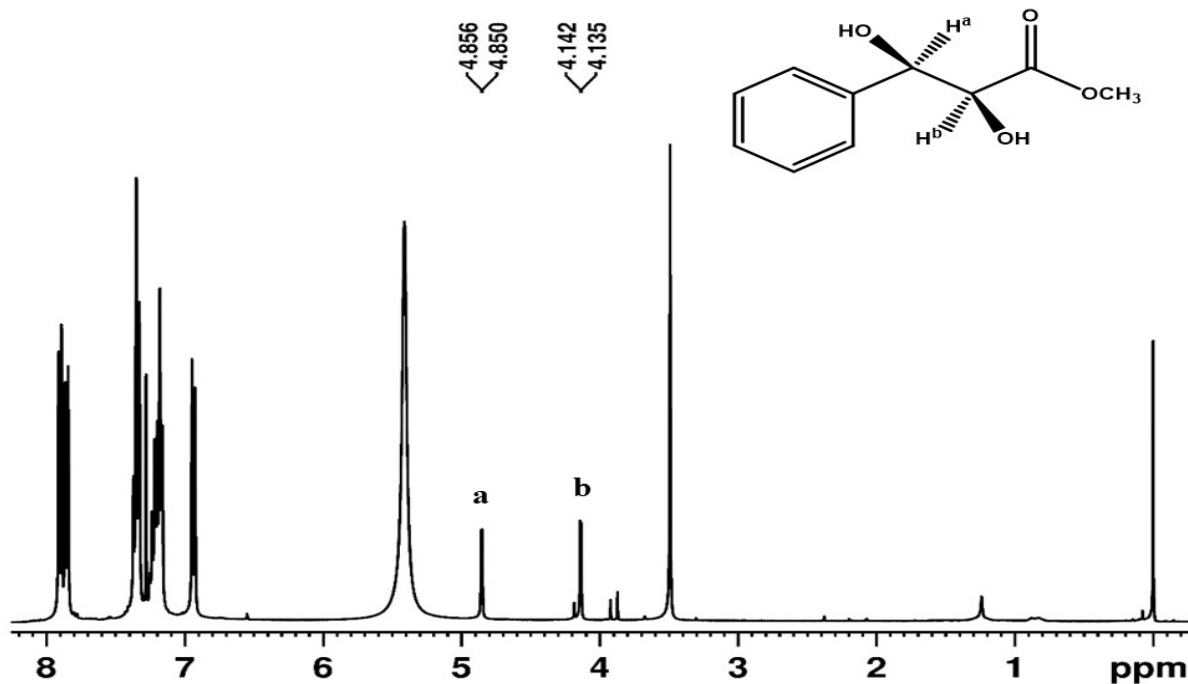

**Fig. S37:** 400 MHz  $^1\text{H}$ -NMR spectrum of (*R*)-BINAM, Methyl (2*S*,3*R*)-(-)-2,3-dihydroxy-3-phenylpropionate and TFMS in  $\text{CDCl}_3$  at 250K

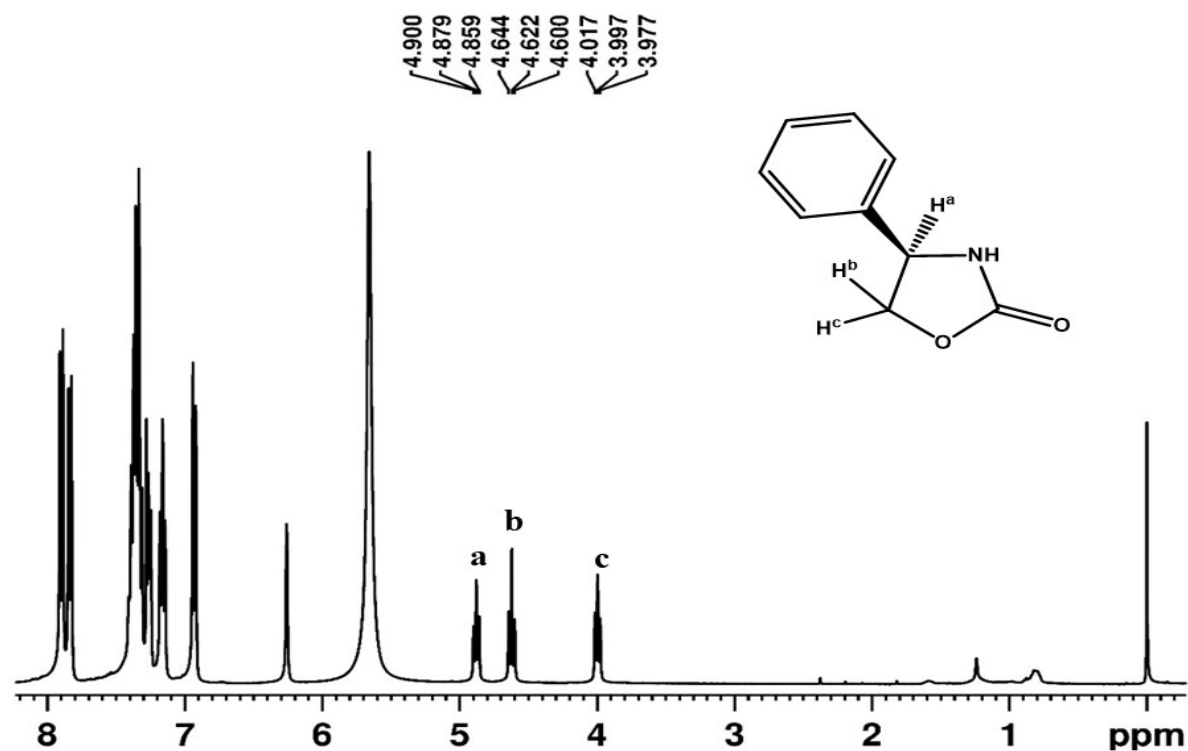

**Fig. S38:** 400 MHz  $^1\text{H}$ -NMR spectrum of (*R*)-BINAM, (*R*)-(-)-4-phenyl-2-oxazolidinone and TFMS in  $\text{CDCl}_3$  at 250K

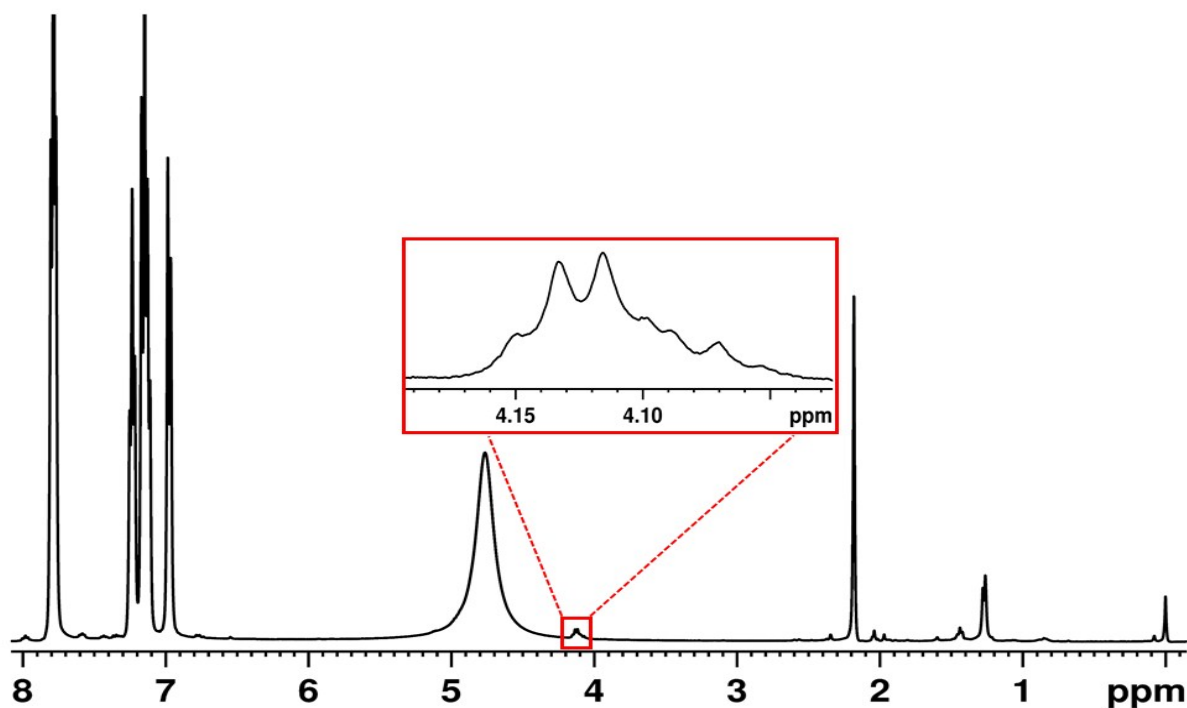

**Fig. S39:** 400 MHz  $^1\text{H}$ -NMR spectrum of (*R*)-BINAM, Lactic acid (from deamination reaction of Alanine), and TFMS in  $\text{CDCl}_3$  at 298K (RT) with zoomed  $\alpha$ -proton region.

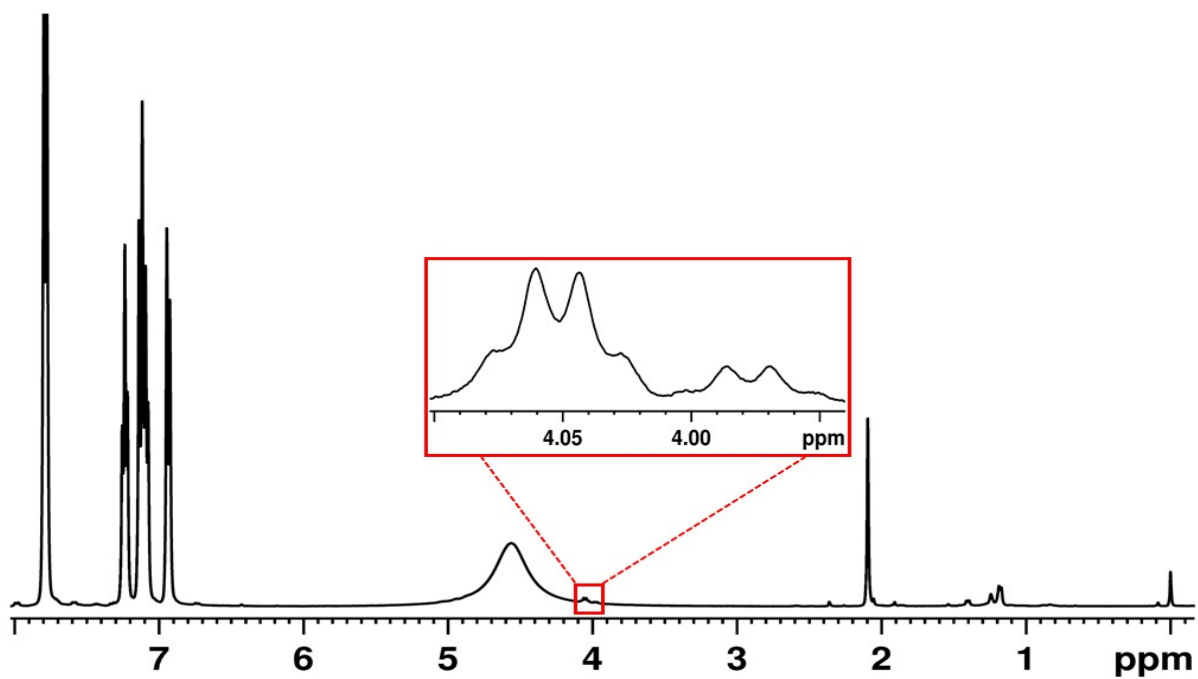

**Fig. S40:** 400 MHz  $^1\text{H}$ -NMR spectrum of (*R*)-BINAM, Lactic acid (from deamination reaction of Alanine), and TFMS in  $\text{CDCl}_3$  at 250K with zoomed  $\alpha$ -proton region.



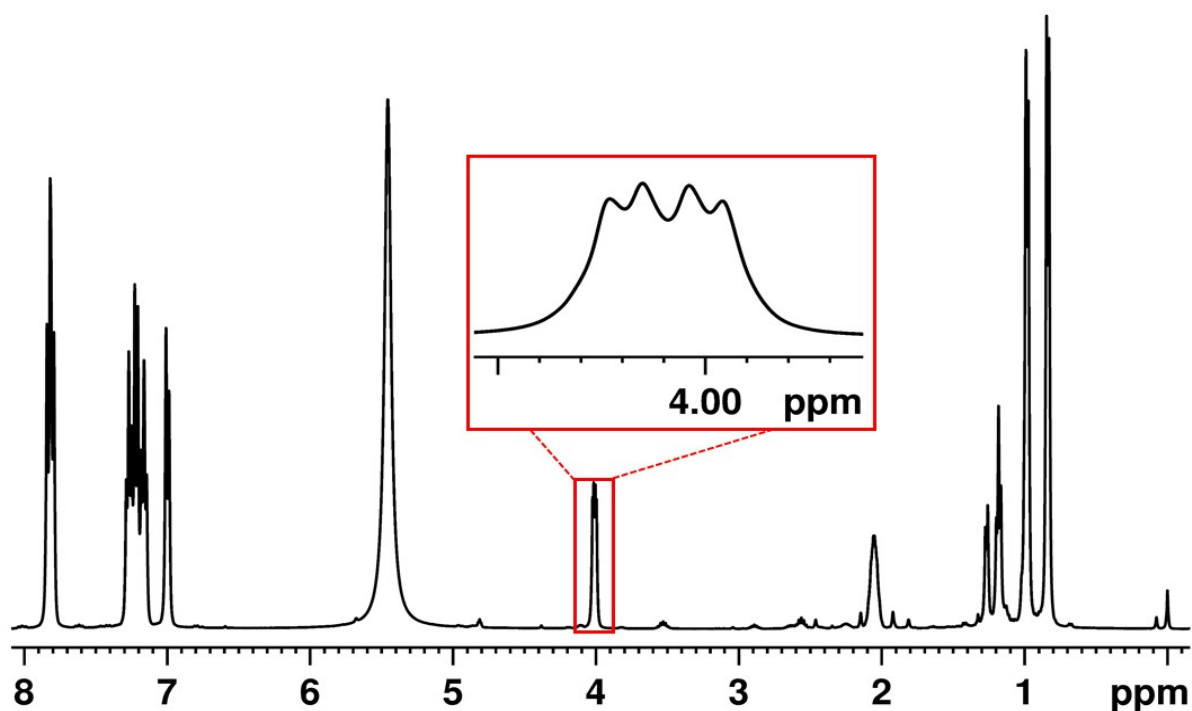

**Fig. S41:** 400 MHz  $^1\text{H}$ -NMR spectrum of (*R*)-BINAM, 2-hydroxy-3-methylbutyric acid (from deamination reaction of Valine), and TFMS in  $\text{CDCl}_3$  at 298K (RT) with zoomed  $\alpha$ -proton region.

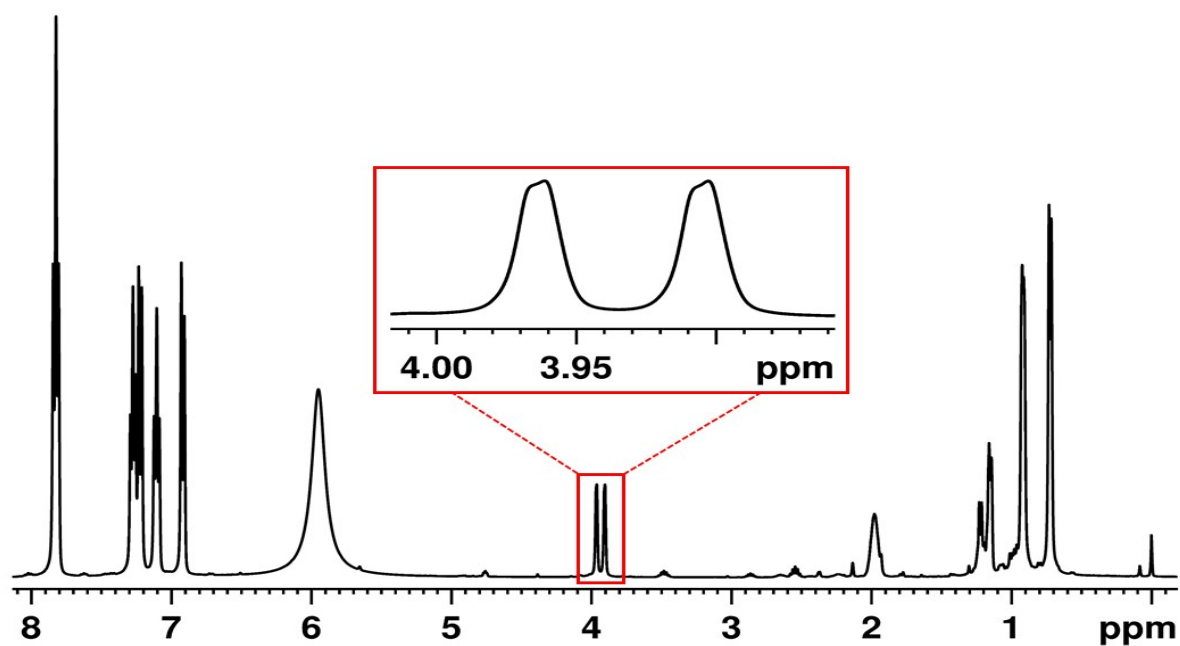

**Fig. S42:** 400 MHz  $^1\text{H}$ -NMR spectrum of (*R*)-BINAM, 2-hydroxy-3-methylbutyric acid (from deamination reaction of Valine), and TFMS in  $\text{CDCl}_3$  at 250K with zoomed  $\alpha$ -proton region.

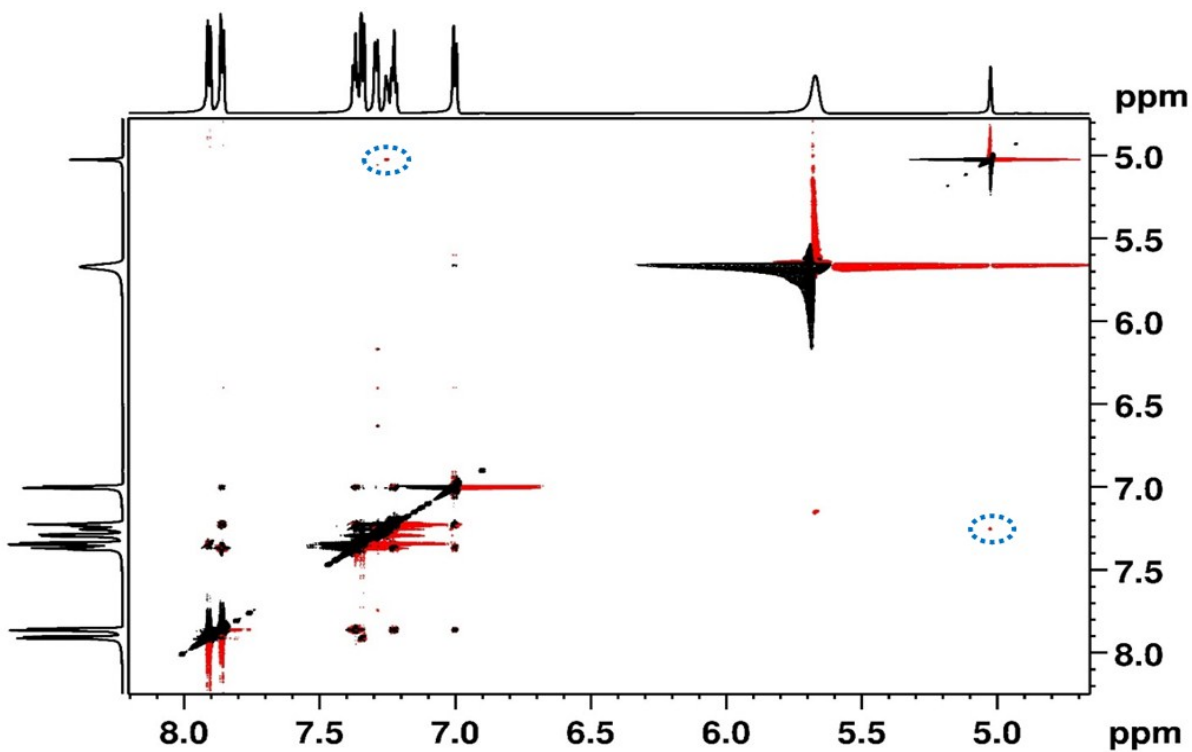

**Fig. S43:** 800 MHz 2D-NOSEY spectrum of (*R*)-BINAM, (*R*)-Mandelic acid and TFMS in  $\text{CDCl}_3$

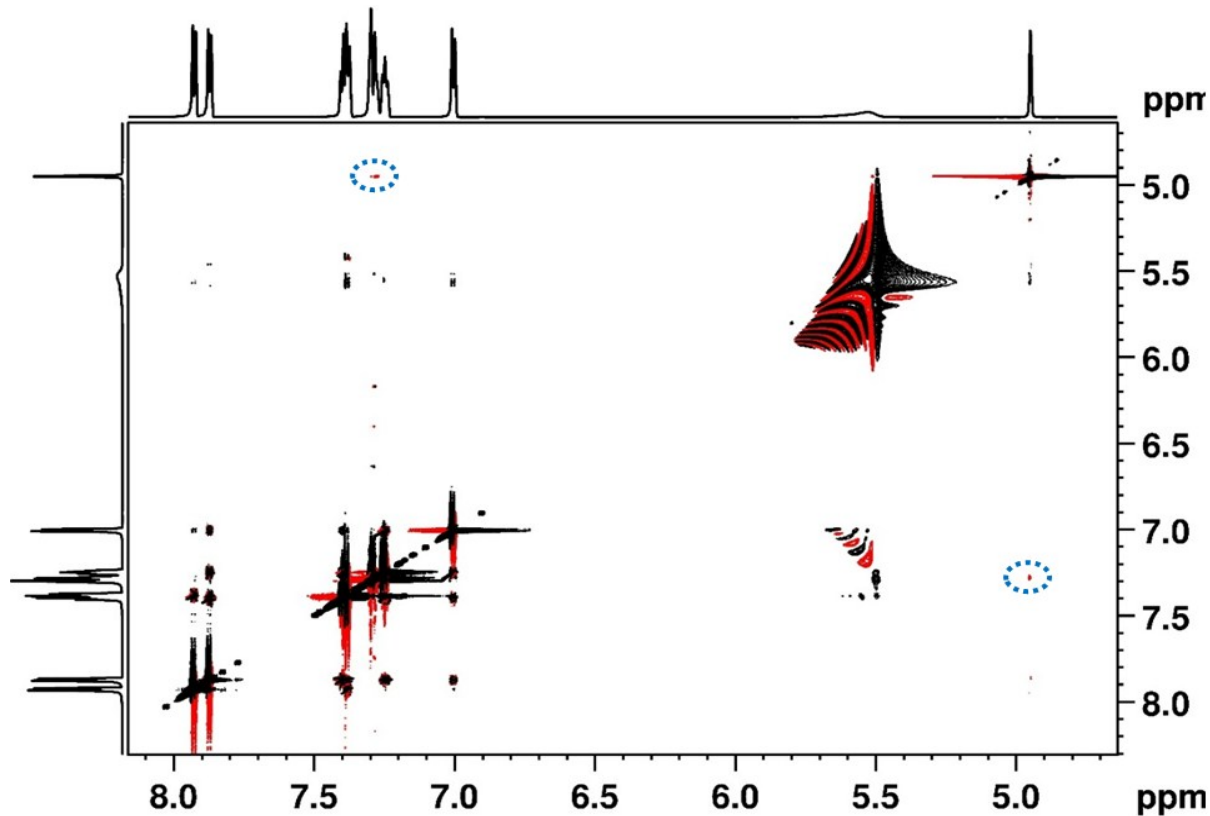

**Fig. S44:** 800 MHz 2D-NOSEY spectrum of (*S*)-BINAM, (*R*)-Mandelic acid and TFMS in  $\text{CDCl}_3$

**Table. S1:** The experimentally determined and laboratory prepared scalemic ratios of (*R*)-BINAM and (*R/S*) – Mandelic acid in presence of TFMS

| Entry | Integration<br>$I_R:I_S$ | Gravimetrically<br>prepared excess of <i>S</i><br>enantiomer<br>% | experimentally<br>measured <i>ee</i><br>$ee\% = \frac{I_R - I_S}{I_R + I_S} \times 100$ | % error |
|-------|--------------------------|-------------------------------------------------------------------|-----------------------------------------------------------------------------------------|---------|
| 1     | 1.000:0.9987             | 0                                                                 | 0                                                                                       | 0       |
| 2     | 1.000:0.8182             | 10                                                                | 9.9                                                                                     | 1.00    |
| 3     | 1.000:0.6616             | 20                                                                | 20.3                                                                                    | 1.50    |
| 4     | 1.000:0.5374             | 30                                                                | 30.0                                                                                    | 0       |
| 5     | 1.000:0.4290             | 40                                                                | 39.9                                                                                    | 0.25    |
| 6     | 1.000:0.3340             | 50                                                                | 49.9                                                                                    | 0.20    |
| 7     | 1.000:0.2502             | 60                                                                | 59.9                                                                                    | 0.16    |
| 8     | 1.000:0.1757             | 70                                                                | 70.1                                                                                    | 0.14    |
| 9     | 1.000:0.1113             | 80                                                                | 79.9                                                                                    | 0.13    |
| 10    | 1.000:0.0527             | 90                                                                | 89.9                                                                                    | 0.11    |
| 11    | 1.000:0.0206             | 96                                                                | 95.9                                                                                    | 0.10    |

Coordinates for (*R*)-BINAM/ (*R*)-Mandelic acid/ TFMS complex (Gaussian 09)

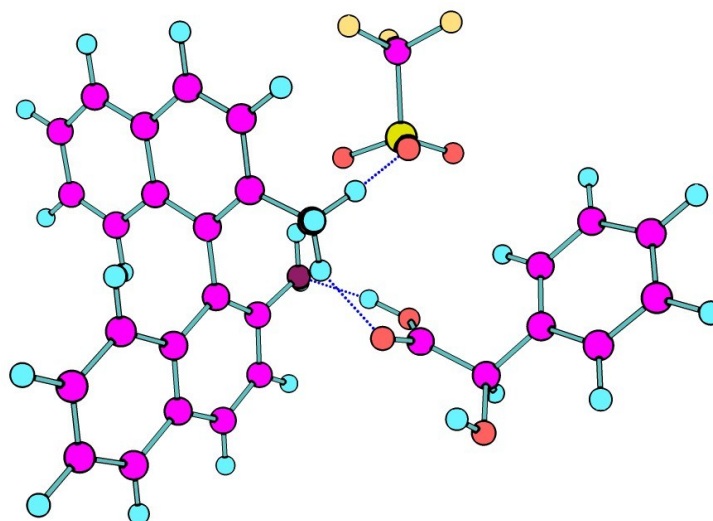

|   |         |          |          |
|---|---------|----------|----------|
| C | 1.43774 | 0.62738  | -1.38000 |
| C | 2.38915 | 0.21588  | -0.46102 |
| C | 3.56448 | 1.02075  | -0.24697 |
| C | 3.73778 | 2.22418  | -1.00392 |
| C | 2.73935 | 2.59805  | -1.94065 |
| C | 1.62213 | 1.82671  | -2.11795 |
| H | 4.45138 | -0.22192 | 1.29518  |
| C | 4.56515 | 0.68014  | 0.70477  |
| C | 4.89274 | 3.02194  | -0.79275 |
| H | 2.86543 | 3.51736  | -2.50554 |
| H | 0.83987 | 2.13637  | -2.80278 |
| C | 5.84430 | 2.65962  | 0.13255  |
| C | 5.67329 | 1.47781  | 0.88892  |
| H | 5.00684 | 3.93192  | -1.37557 |
| H | 6.72234 | 3.27920  | 0.28736  |
| H | 6.42223 | 1.19641  | 1.62332  |

|   |          |          |          |
|---|----------|----------|----------|
| C | 2.22658  | -1.04855 | 0.32234  |
| C | 2.99397  | -2.21684 | -0.02170 |
| C | 1.38706  | -1.13100 | 1.41589  |
| C | 3.85708  | -2.24080 | -1.15126 |
| C | 2.89055  | -3.40138 | 0.77840  |
| C | 1.27406  | -2.29864 | 2.20738  |
| C | 4.57908  | -3.37010 | -1.46691 |
| H | 3.94128  | -1.35326 | -1.76751 |
| C | 3.65253  | -4.54738 | 0.42802  |
| C | 2.02095  | -3.40626 | 1.90011  |
| H | 0.57898  | -2.31274 | 3.04113  |
| C | 4.48035  | -4.53463 | -0.67042 |
| H | 5.23025  | -3.36743 | -2.33573 |
| H | 3.56464  | -5.43817 | 1.04383  |
| H | 1.94050  | -4.30476 | 2.50449  |
| H | 5.05657  | -5.41724 | -0.93060 |
| N | 0.21652  | -0.12699 | -1.58910 |
| N | 0.48175  | -0.03070 | 1.77542  |
| H | 0.28462  | -0.64124 | -2.44403 |
| H | 0.57980  | 0.23533  | 2.75750  |
| S | -1.42029 | 2.40178  | 0.29910  |
| O | -1.57198 | 2.15909  | -1.15755 |
| O | -2.31264 | 1.62063  | 1.18001  |
| O | 0.00981  | 2.40141  | 0.76198  |
| C | -1.92652 | 4.17689  | 0.52107  |
| F | -3.20958 | 4.33402  | 0.17260  |
| F | -1.17294 | 4.97835  | -0.24197 |
| F | -1.78187 | 4.54407  | 1.80092  |
| C | -2.10908 | -1.93035 | 0.65416  |
| O | -1.77378 | -1.32182 | 1.66657  |

|   |          |          |          |
|---|----------|----------|----------|
| O | -1.48163 | -1.89115 | -0.50603 |
| C | -3.35412 | -2.81574 | 0.62218  |
| C | -4.56887 | -2.01401 | 0.13591  |
| C | -5.56805 | -2.68007 | -0.58309 |
| C | -4.71449 | -0.64851 | 0.41504  |
| C | -6.69946 | -1.99090 | -1.02046 |
| H | -5.45119 | -3.73766 | -0.79450 |
| C | -5.84629 | 0.03629  | -0.02968 |
| H | -3.95233 | -0.10196 | 0.96253  |
| C | -6.84122 | -0.62999 | -0.74617 |
| H | -7.46889 | -2.51897 | -1.57688 |
| H | -5.93902 | 1.09722  | 0.18175  |
| H | -7.71949 | -0.09189 | -1.09118 |
| O | -3.11958 | -3.99020 | -0.13456 |
| H | -2.87045 | -3.70132 | -1.02507 |
| H | -3.52112 | -3.15192 | 1.65055  |
| H | 0.53464  | 0.87452  | 1.22383  |
| H | -0.97197 | -0.82428 | 1.49008  |
| H | 0.08236  | -0.76171 | -0.82809 |
| H | -1.11760 | 1.34768  | -1.39580 |

Coordinates  
BINAM/  
Mandelic  
complex

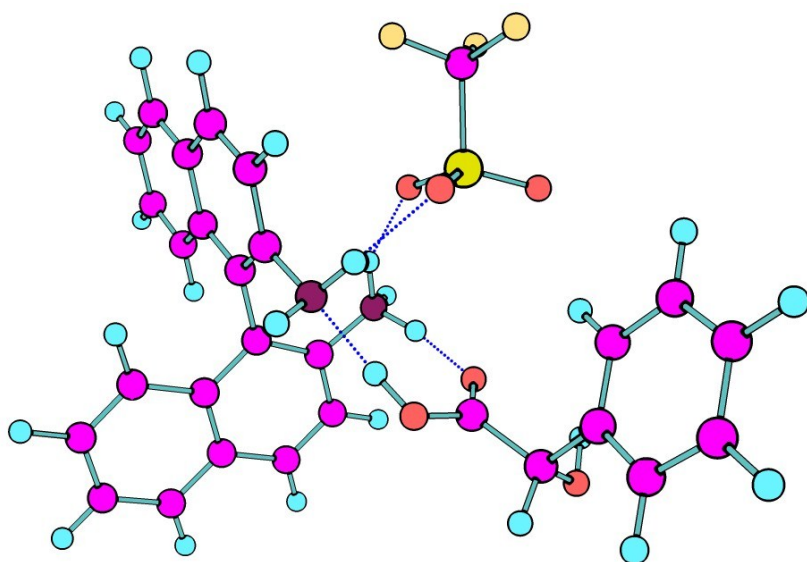

for (*R*)-  
(*S*)-  
acid/ TFMS

(Gaussian 09)

|   |          |          |          |
|---|----------|----------|----------|
| C | -0.86816 | -1.03087 | -1.74312 |
| C | -0.09755 | -0.15921 | -0.95563 |
| C | 1.21045  | 0.22568  | -1.40423 |
| C | 1.71813  | -0.27245 | -2.65572 |
| C | 0.89914  | -1.15062 | -3.42001 |
| C | -0.34889 | -1.52007 | -2.98226 |
| H | 1.68210  | 1.47428  | 0.30280  |
| C | 2.04759  | 1.09898  | -0.64634 |
| C | 3.01343  | 0.11759  | -3.09343 |
| H | 1.27796  | -1.53078 | -4.36478 |
| H | -0.96177 | -2.19271 | -3.57630 |
| C | 3.79530  | 0.96714  | -2.33590 |
| C | 3.30202  | 1.45797  | -1.10010 |
| H | 3.37901  | -0.26973 | -4.04108 |
| H | 4.78314  | 1.25789  | -2.67856 |
| H | 3.92035  | 2.12155  | -0.50301 |
| C | -0.65927 | 0.36162  | 0.33379  |

|   |          |          |          |
|---|----------|----------|----------|
| C | -0.56077 | -0.39917 | 1.54697  |
| C | -1.30176 | 1.61086  | 0.35317  |
| C | 0.08833  | -1.66960 | 1.59699  |
| C | -1.12629 | 0.11439  | 2.76703  |
| C | -1.85553 | 2.10927  | 1.57354  |
| C | 0.16804  | -2.38514 | 2.77599  |
| H | 0.52729  | -2.06449 | 0.68778  |
| C | -1.02705 | -0.64834 | 3.96282  |
| C | -1.77011 | 1.38348  | 2.73614  |
| H | -2.34881 | 3.07755  | 1.56628  |
| C | -0.39456 | -1.87583 | 3.97412  |
| H | 0.66989  | -3.34804 | 2.78781  |
| H | -1.46008 | -0.24305 | 4.87383  |
| H | -2.19743 | 1.77662  | 3.65455  |
| H | -0.32330 | -2.44963 | 4.89253  |
| N | -2.12997 | -1.42711 | -1.34674 |
| H | -2.55121 | -0.70208 | -0.80186 |
| H | -2.69199 | -1.60660 | -2.15416 |
| N | -1.41609 | 2.37477  | -0.79124 |
| H | -1.46124 | 1.77436  | -1.58966 |
| H | -2.24847 | 2.92676  | -0.74177 |
| H | -2.06061 | -2.25963 | -0.79710 |
| H | -0.62137 | 2.97646  | -0.87115 |
| S | -2.54465 | 1.19589  | -3.67664 |
| O | -2.32446 | -0.36120 | -3.11463 |
| O | -4.02201 | 1.48005  | -3.80619 |
| O | -1.86190 | 2.27715  | -2.60257 |
| C | -1.90562 | 1.33716  | -4.98174 |
| F | -2.57861 | 0.60413  | -5.89402 |
| F | -0.62977 | 0.90218  | -4.90752 |



|   |          |          |          |
|---|----------|----------|----------|
| F | -1.91758 | 2.63578  | -5.35045 |
| C | -3.73760 | 0.68322  | -0.86892 |
| O | -3.16718 | 1.61512  | -1.57571 |
| O | -3.57696 | -0.56747 | -1.19037 |
| C | -4.60278 | 1.06049  | 0.34794  |
| C | -5.14932 | -0.10082 | 0.91059  |
| C | -5.99857 | -0.00844 | 2.01364  |
| C | -4.84438 | -1.34900 | 0.36782  |
| C | -6.54218 | -1.16410 | 2.57414  |
| H | -6.23816 | 0.97569  | 2.44179  |
| C | -5.38886 | -2.50503 | 0.92777  |
| H | -4.17520 | -1.42197 | -0.50166 |
| C | -6.23754 | -2.41280 | 2.03084  |
| H | -7.21108 | -1.09142 | 3.44396  |
| H | -5.14859 | -3.48901 | 0.49936  |
| H | -6.66633 | -3.32385 | 2.47292  |
| O | -5.65833 | 1.93046  | -0.06903 |
| H | -6.14165 | 1.52418  | -0.79217 |
| H | -4.05133 | 1.51355  | 1.01031  |

Coordinates for (*S*)-BINAM/ (*R*)-Mandelic acid/ TFMS complex (Gaussian 09)

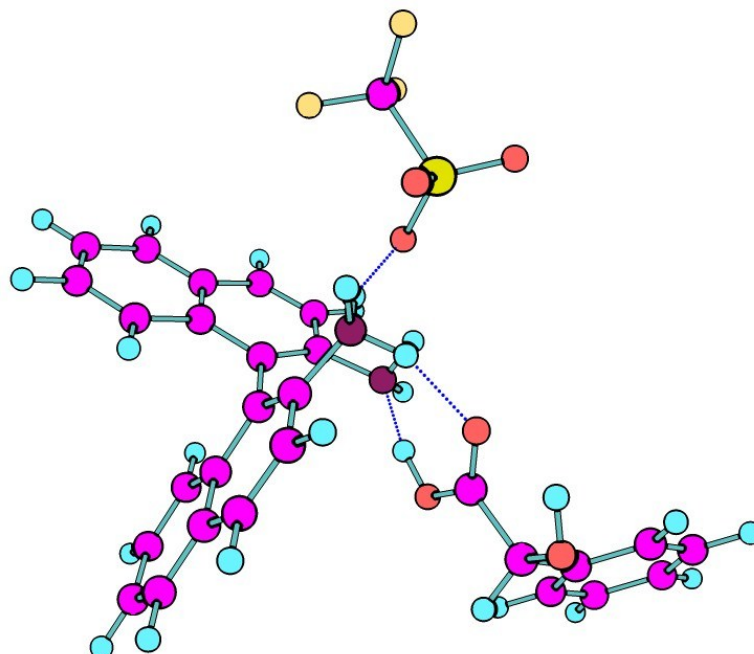

|   |         |          |          |
|---|---------|----------|----------|
| C | 2.28979 | -1.00965 | 0.32991  |
| C | 1.26851 | -1.39119 | -0.59852 |
| C | 0.87806 | -2.75183 | -0.68613 |
| C | 1.45482 | -3.70748 | 0.11617  |
| C | 2.44959 | -3.33217 | 1.04633  |
| C | 2.85688 | -2.02200 | 1.15128  |
| C | 2.67664 | 0.36667  | 0.41722  |
| H | 0.10790 | -3.02430 | -1.39994 |
| H | 1.14797 | -4.74420 | 0.04190  |
| H | 2.89721 | -4.08564 | 1.68467  |
| H | 3.62101 | -1.75507 | 1.87058  |
| C | 0.65930 | -0.39107 | -1.40098 |
| C | 1.02837 | 0.92259  | -1.29787 |
| C | 2.04289 | 1.30728  | -0.38408 |
| C | 3.73661 | 0.82999  | 1.36182  |

|   |          |          |          |
|---|----------|----------|----------|
| H | -0.11681 | -0.68158 | -2.10041 |
| H | 0.55611  | 1.68502  | -1.90635 |
| C | 5.12299  | 0.53624  | 1.13751  |
| C | 6.10634  | 0.99804  | 2.07090  |
| C | 5.69619  | 1.75767  | 3.19531  |
| C | 4.37370  | 2.05868  | 3.38808  |
| C | 3.41632  | 1.58868  | 2.46750  |
| C | 5.56333  | -0.18487 | -0.00432 |
| C | 6.89732  | -0.45115 | -0.19959 |
| C | 7.86371  | -0.01235 | 0.73401  |
| C | 7.47513  | 0.69849  | 1.84236  |
| H | 6.44233  | 2.10720  | 3.89929  |
| H | 4.06050  | 2.65244  | 4.23944  |
| N | 2.01555  | 1.96862  | 2.71255  |
| H | 4.83283  | -0.52005 | -0.72864 |
| H | 7.21333  | -0.99934 | -1.07956 |
| H | 8.91168  | -0.23252 | 0.56693  |
| H | 8.21047  | 1.04915  | 2.55819  |
| S | -1.03307 | 2.56490  | 1.62629  |
| O | -0.90627 | 1.76852  | 2.86703  |
| O | -0.00759 | 2.27707  | 0.60097  |
| O | -1.28486 | 4.00830  | 1.85428  |
| C | 2.62855  | 7.87206  | 1.31926  |
| C | 3.17573  | 8.37476  | 0.13604  |
| C | 2.44182  | 9.24748  | -0.66377 |
| C | 1.15484  | 9.62877  | -0.28579 |
| C | 0.60819  | 9.13286  | 0.89641  |
| C | 1.34119  | 8.25759  | 1.69615  |
| C | 3.42737  | 6.90926  | 2.19661  |
| H | 4.17694  | 8.08327  | -0.16161 |
| H | 2.87767  | 9.63483  | -1.57779 |
| H | 0.58547  | 10.31232 | -0.90541 |
| H | -0.38903 | 9.43087  | 1.20075  |

|   |          |         |          |
|---|----------|---------|----------|
| H | 0.92560  | 7.88573 | 2.62424  |
| C | 3.25341  | 5.46650 | 1.70741  |
| H | 4.49163  | 7.15001 | 2.10069  |
| O | 3.06437  | 6.98414 | 3.55808  |
| O | 3.77337  | 5.24597 | 0.52564  |
| O | 2.67760  | 4.63852 | 2.39836  |
| H | 2.58080  | 6.16807 | 3.75360  |
| C | -2.63286 | 1.95074 | 0.87197  |
| F | -2.54670 | 0.64404 | 0.61637  |
| F | -3.64695 | 2.16250 | 1.71466  |
| F | -2.87617 | 2.60058 | -0.26861 |
| N | 2.42912  | 2.60252 | -0.27134 |
| H | 1.92300  | 2.96206 | 2.64542  |
| H | 2.09524  | 2.97579 | 0.59422  |
| H | 2.04947  | 3.13088 | -1.03075 |
| H | 1.42776  | 1.53229 | 2.03129  |
| H | 1.74424  | 1.66964 | 3.62743  |
| H | 3.42743  | 2.65588 | -0.29436 |

Coordinates for (*S*)-BINAM/ (*S*)-Mandelic acid/ TFMS complex (Gaussian 09)

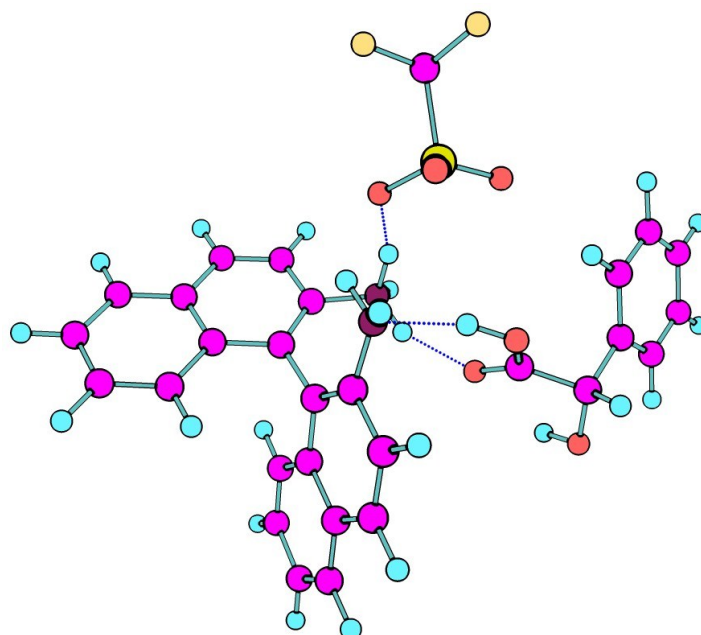

|   |          |          |          |
|---|----------|----------|----------|
| C | 2.95062  | -1.47687 | 0.75595  |
| C | 3.72712  | -1.05236 | 1.88236  |
| C | 5.10352  | -1.39226 | 1.95472  |
| C | 5.70721  | -2.11371 | 0.95140  |
| C | 4.95046  | -2.52185 | -0.17025 |
| C | 3.61082  | -2.21500 | -0.26505 |
| C | 1.54998  | -1.13375 | 0.68561  |
| H | 5.67414  | -1.06052 | 2.81779  |
| H | 6.76195  | -2.36313 | 1.01329  |
| H | 5.43076  | -3.07953 | -0.96860 |
| H | 3.05236  | -2.53272 | -1.13749 |
| C | 3.10289  | -0.28702 | 2.90092  |
| C | 1.78744  | 0.07584  | 2.79079  |
| C | 1.00540  | -0.33246 | 1.67943  |
| C | 0.73692  | -1.69887 | -0.44140 |
| H | 3.69068  | 0.03326  | 3.75635  |
| H | 1.32728  | 0.70461  | 3.54759  |
| C | 0.45669  | -3.11333 | -0.47131 |
| C | -0.21839 | -3.68348 | -1.60040 |
| C | -0.61559 | -2.84183 | -2.67200 |
| C | -0.38768 | -1.49165 | -2.61666 |
| C | 0.28184  | -0.93652 | -1.50130 |
| C | 0.80976  | -3.97596 | 0.60252  |
| C | 0.52434  | -5.32229 | 0.55490  |
| C | -0.12435 | -5.88329 | -0.56922 |
| C | -0.48831 | -5.07756 | -1.62256 |
| H | -1.12123 | -3.27736 | -3.52856 |
| H | -0.72296 | -0.83724 | -3.41555 |
| N | 0.36365  | 0.52198  | -1.46601 |
| H | 1.30467  | -3.56062 | 1.47199  |
| H | 0.79908  | -5.95954 | 1.38990  |
| H | -0.33889 | -6.94721 | -0.59464 |

|   |          |          |          |
|---|----------|----------|----------|
| H | -0.99596 | -5.49424 | -2.48803 |
| S | 1.30892  | 3.50375  | -0.66228 |
| O | 1.22547  | 3.03204  | -2.07076 |
| O | 1.11458  | 2.35574  | 0.30753  |
| O | 0.58374  | 4.72602  | -0.31674 |
| C | -5.41860 | 0.31486  | 0.24422  |
| C | -5.61202 | -0.42621 | 1.41584  |
| C | -6.41481 | 0.07421  | 2.44011  |
| C | -7.03200 | 1.31957  | 2.30241  |
| C | -6.84451 | 2.05792  | 1.13370  |
| C | -6.04142 | 1.55780  | 0.10751  |
| C | -4.52636 | -0.22223 | -0.87882 |
| H | -5.13064 | -1.39369 | 1.52652  |
| H | -6.56352 | -0.51081 | 3.34326  |
| H | -7.66003 | 1.70785  | 3.09890  |

## Reference

Gaussian 09, Revision D.01, M. J. Frisch, G. W. Trucks, H. B. Schlegel, G. E. Scuseria, M. A. Robb, J. R. Cheeseman, G. Scalmani, V. Barone, B. Mennucci, G. A. Petersson, H. Nakatsuji, M. Caricato, X. Li, H. P. Hratchian, A. F. Izmaylov, J. Bloino, G. Zheng, J. L. Sonnenberg, M. Hada, M. Ehara, K. Toyota, R. Fukuda, J. Hasegawa, M. Ishida, T. Nakajima, Y. Honda, O. Kitao, H. Nakai, T. Vreven, J. A. Montgomery, Jr., J. E. Peralta, F. Ogliaro, M. Bearpark, J. J. Heyd, E. Brothers, K. N. Kudin, V. N. Staroverov, T. Keith, R. Kobayashi, J. Normand, K. Raghavachari, A. Rendell, J. C. Burant, S. S. Iyengar, J. Tomasi, M. Cossi, N. Rega, J. M. Millam, M. Klene, J. E. Knox, J. B. Cross, V. Bakken, C. Adamo, J. Jaramillo, R. Gomperts, R. E. Stratmann, O. Yazyev, A. J. Austin, R. Cammi, C. Pomelli, J. W. Ochterski, R. L. Martin, K. Morokuma, V. G. Zakrzewski, G. A. Voth, P. Salvador, J. J. Dannenberg, S. Dapprich, A. D. Daniels, O. Farkas, J. B. Foresman, J. V. Ortiz, J. Cioslowski, and D. J. Fox, Gaussian, Inc., Wallingford CT, 2013.
